# Supplementary material for: Bracon wasps for ecological pest control–a laboratory experiment
Source: PeerJ. 2021 May 27;9:e11540. doi: 10.7717/peerj.11540 (PMC8164837; doi:10.7717/peerj.11540)
Supplement: Supplemental Information 2 — Number of initial replications for evaluation reproductive success of females wasps on a) a single host and b) different numbers of host larvae at different temperatures. [file peerj-09-11540-s002.xlsx]

## Sheet: Tabelle1
Appendix 2 Number of initial replications for evaluation reproductive success of females wasps on a) a single host and b) different numbers of host larvae at different temperatures.
a) Number of replications for evaluating reproductive success of female wasps on a single host larva at different temperatures
	12°C	20°C	27°C	36°C
Bracon brevicornis	5	44	42	5
Bracon hebetor	4	41	29	11
b) Number of replications for evaluation of reproductive success of female wasps on different numbers of host larvae at different temperatures
no. of presented host larvae	Bracon brevicornis				Bracon hebetor
	12°C	20°C	27°C	36°C	12°C	20°C	27°C	36°C
5	16	22	19	18	20	23	16	25
10	17	21	20	9	19	28	19	20
15	15	22	18	10	17	23	20	18
20	12	22	18	7	17	23	23	16
25	13	22	20	8	21	23	17	15
