# Supplementary material for: Bracon wasps for ecological pest control–a laboratory experiment
Source: PeerJ. 2021 May 27;9:e11540. doi: 10.7717/peerj.11540 (PMC8164837; doi:10.7717/peerj.11540)
Supplement: Supplemental Information 3 — Abbreviations: m = male, f = female, tot=total. [file peerj-09-11540-s003.xlsx]

## Sheet: Appendix2
Appendix 3 Raw data for experiments of Bracon species on one host larva. Abbreviations: m=male, f=female, tot=total.
Strain	Date	Temperature	Gender	Number	Species
strain_1	2019-01-24	27	m	8	Bracon_hebetor
strain_1	2019-01-24	27	f	3	Bracon_hebetor
strain_1	2019-01-24	27	tot	11	Bracon_hebetor
strain_1	2019-02-13	27	tot	3	Bracon_hebetor
strain_1	2019-02-13	27	f	2	Bracon_hebetor
strain_1	2019-02-13	27	m	1	Bracon_hebetor
strain_1	2019-02-13	27	tot	7	Bracon_hebetor
strain_1	2019-02-13	27	f	4	Bracon_hebetor
strain_1	2019-02-13	27	m	3	Bracon_hebetor
strain_1	2019-02-13	27	tot	15	Bracon_hebetor
strain_1	2019-02-13	27	f	12	Bracon_hebetor
strain_1	2019-02-13	27	m	3	Bracon_hebetor
strain_1	2019-01-29	20	tot	14	Bracon_hebetor
strain_1	2019-01-29	20	f	4	Bracon_hebetor
strain_1	2019-01-29	20	m	10	Bracon_hebetor
strain_1	2019-02-14	27	tot	8	Bracon_hebetor
strain_1	2019-02-14	27	f	2	Bracon_hebetor
strain_1	2019-02-14	27	m	6	Bracon_hebetor
strain_1	2019-02-04	20	tot	6	Bracon_hebetor
strain_1	2019-02-04	20	f	2	Bracon_hebetor
strain_1	2019-02-04	20	m	4	Bracon_hebetor
strain_1	2019-02-18	27	tot	12	Bracon_hebetor
strain_1	2019-02-18	27	f	8	Bracon_hebetor
strain_1	2019-02-18	27	m	4	Bracon_hebetor
strain_1	2019-02-04	20	tot	4	Bracon_hebetor
strain_1	2019-02-04	20	f	2	Bracon_hebetor
strain_1	2019-02-04	20	m	2	Bracon_hebetor
strain_1	2019-02-05	27	tot	12	Bracon_hebetor
strain_1	2019-02-05	27	f	10	Bracon_hebetor
strain_1	2019-02-05	27	m	2	Bracon_hebetor
strain_1	2019-02-04	20	tot	5	Bracon_hebetor
strain_1	2019-02-04	20	f	3	Bracon_hebetor
strain_1	2019-02-04	20	m	2	Bracon_hebetor
strain_1	2019-03-01	27	tot	2	Bracon_hebetor
strain_1	2019-03-01	27	f	2	Bracon_hebetor
strain_1	2019-03-01	27	m	0	Bracon_hebetor
strain_1	2019-03-01	27	tot	10	Bracon_hebetor
strain_1	2019-03-01	27	f	1	Bracon_hebetor
strain_1	2019-03-01	27	m	9	Bracon_hebetor
strain_1	2019-03-01	27	tot	10	Bracon_hebetor
strain_1	2019-03-01	27	f	1	Bracon_hebetor
strain_1	2019-03-01	27	m	9	Bracon_hebetor
strain_1	2019-03-01	27	tot	6	Bracon_hebetor
strain_1	2019-03-01	27	f	1	Bracon_hebetor
strain_1	2019-03-01	27	m	5	Bracon_hebetor
strain_1	2019-03-01	27	tot	1	Bracon_hebetor
strain_1	2019-03-01	27	f	1	Bracon_hebetor
strain_1	2019-03-01	27	m	0	Bracon_hebetor
strain_1	2019-02-15	20	tot	1	Bracon_hebetor
strain_1	2019-02-15	20	f	1	Bracon_hebetor
strain_1	2019-02-15	20	m	0	Bracon_hebetor
strain_1	2019-03-01	27	tot	8	Bracon_hebetor
strain_1	2019-03-01	27	f	3	Bracon_hebetor
strain_1	2019-03-01	27	m	5	Bracon_hebetor
strain_1	2019-03-01	20	tot	2	Bracon_hebetor
strain_1	2019-03-01	20	f	1	Bracon_hebetor
strain_1	2019-03-01	20	m	1	Bracon_hebetor
strain_1	2019-03-01	20	tot	7	Bracon_hebetor
strain_1	2019-03-01	20	f	4	Bracon_hebetor
strain_1	2019-03-01	20	m	3	Bracon_hebetor
strain_1	2019-03-15	12	tot	0	Bracon_hebetor
strain_1	2019-03-15	12	f	0	Bracon_hebetor
strain_1	2019-03-15	12	m	0	Bracon_hebetor
strain_1	2019-03-15	12	tot	0	Bracon_hebetor
strain_1	2019-03-15	12	f	0	Bracon_hebetor
strain_1	2019-03-15	12	m	0	Bracon_hebetor
strain_1	2019-03-15	12	tot	0	Bracon_hebetor
strain_1	2019-03-15	12	f	0	Bracon_hebetor
strain_1	2019-03-15	12	m	0	Bracon_hebetor
strain_1	2019-03-15	12	tot	0	Bracon_hebetor
strain_1	2019-03-15	12	f	0	Bracon_hebetor
strain_1	2019-03-15	12	m	0	Bracon_hebetor
strain_1	2019-03-15	12	tot	0	Bracon_hebetor
strain_1	2019-03-15	12	f	0	Bracon_hebetor
strain_1	2019-03-15	12	m	0	Bracon_hebetor
strain_2	2019-01-23	27	tot	9	Bracon_brevicornis
strain_2	2019-01-23	27	f	9	Bracon_brevicornis
strain_2	2019-01-23	27	m	0	Bracon_brevicornis
strain_2	2019-01-23	27	tot	6	Bracon_brevicornis
strain_2	2019-01-23	27	f	6	Bracon_brevicornis
strain_2	2019-01-23	27	m	0	Bracon_brevicornis
strain_2	2019-01-23	27	tot	14	Bracon_brevicornis
strain_2	2019-01-23	27	f	12	Bracon_brevicornis
strain_2	2019-01-23	27	m	2	Bracon_brevicornis
strain_2	2019-01-23	27	tot	4	Bracon_brevicornis
strain_2	2019-01-23	27	f	4	Bracon_brevicornis
strain_2	2019-01-23	27	m	0	Bracon_brevicornis
strain_2	2019-01-24	27	tot	9	Bracon_brevicornis
strain_2	2019-01-24	27	f	6	Bracon_brevicornis
strain_2	2019-01-24	27	m	3	Bracon_brevicornis
strain_2	2019-01-23	27	tot	4	Bracon_brevicornis
strain_2	2019-01-23	27	f	2	Bracon_brevicornis
strain_2	2019-01-23	27	m	2	Bracon_brevicornis
strain_2	2019-01-23	27	tot	7	Bracon_brevicornis
strain_2	2019-01-23	27	f	3	Bracon_brevicornis
strain_2	2019-01-23	27	m	4	Bracon_brevicornis
strain_2	2019-01-28	27	tot	7	Bracon_brevicornis
strain_2	2019-01-28	27	f	1	Bracon_brevicornis
strain_2	2019-01-28	27	m	6	Bracon_brevicornis
strain_2	2019-01-28	27	tot	10	Bracon_brevicornis
strain_2	2019-01-28	27	f	3	Bracon_brevicornis
strain_2	2019-01-28	27	m	7	Bracon_brevicornis
strain_2	2019-01-28	27	tot	10	Bracon_brevicornis
strain_2	2019-01-28	27	f	4	Bracon_brevicornis
strain_2	2019-01-28	27	m	6	Bracon_brevicornis
strain_2	2019-01-29	27	tot	14	Bracon_brevicornis
strain_2	2019-01-29	27	f	6	Bracon_brevicornis
strain_2	2019-01-29	27	m	8	Bracon_brevicornis
strain_2	2019-01-22	27	tot	3	Bracon_brevicornis
strain_2	2019-01-22	27	f	2	Bracon_brevicornis
strain_2	2019-01-22	27	m	1	Bracon_brevicornis
strain_2	2019-01-23	27	tot	2	Bracon_brevicornis
strain_2	2019-01-23	27	f	2	Bracon_brevicornis
strain_2	2019-01-23	27	m	0	Bracon_brevicornis
strain_2	2019-01-24	27	tot	7	Bracon_brevicornis
strain_2	2019-01-24	27	f	7	Bracon_brevicornis
strain_2	2019-01-24	27	m	0	Bracon_brevicornis
strain_2	2019-02-07	27	tot	2	Bracon_brevicornis
strain_2	2019-02-07	27	f	1	Bracon_brevicornis
strain_2	2019-02-07	27	m	1	Bracon_brevicornis
strain_2	2019-02-07	27	tot	1	Bracon_brevicornis
strain_2	2019-02-07	27	f	1	Bracon_brevicornis
strain_2	2019-02-07	27	m	0	Bracon_brevicornis
strain_2	2019-01-28	20	tot	7	Bracon_brevicornis
strain_2	2019-01-28	20	f	1	Bracon_brevicornis
strain_2	2019-01-28	20	m	6	Bracon_brevicornis
strain_2	2019-02-14	27	tot	13	Bracon_brevicornis
strain_2	2019-02-14	27	f	5	Bracon_brevicornis
strain_2	2019-02-14	27	m	8	Bracon_brevicornis
strain_2	2019-02-04	20	tot	7	Bracon_brevicornis
strain_2	2019-02-04	20	f	6	Bracon_brevicornis
strain_2	2019-02-04	20	m	1	Bracon_brevicornis
strain_2	2019-02-14	20	tot	11	Bracon_brevicornis
strain_2	2019-02-14	20	f	4	Bracon_brevicornis
strain_2	2019-02-14	20	m	7	Bracon_brevicornis
strain_2		20	tot	2	Bracon_brevicornis
strain_2		20	f	2	Bracon_brevicornis
strain_2		20	m	0	Bracon_brevicornis
strain_2	2019-03-15	12	tot	0	Bracon_brevicornis
strain_2	2019-03-15	12	f	0	Bracon_brevicornis
strain_2	2019-03-15	12	m	0	Bracon_brevicornis
strain_2	2019-03-15	12	tot	0	Bracon_brevicornis
strain_2	2019-03-15	12	f	0	Bracon_brevicornis
strain_2	2019-03-15	12	m	0	Bracon_brevicornis
strain_2	2019-03-15	12	tot	0	Bracon_brevicornis
strain_2	2019-03-15	12	f	0	Bracon_brevicornis
strain_2	2019-03-15	12	m	0	Bracon_brevicornis
strain_2	2019-03-15	12	tot	0	Bracon_brevicornis
strain_2	2019-03-15	12	f	0	Bracon_brevicornis
strain_2	2019-03-15	12	m	0	Bracon_brevicornis
strain_3	2019-01-23	27	tot	15	Bracon_brevicornis
strain_3	2019-01-23	27	f	3	Bracon_brevicornis
strain_3	2019-01-23	27	m	12	Bracon_brevicornis
strain_3	2019-01-23	27	tot	7	Bracon_brevicornis
strain_3	2019-01-23	27	f	2	Bracon_brevicornis
strain_3	2019-01-23	27	m	5	Bracon_brevicornis
strain_3	2019-01-24	27	tot	8	Bracon_brevicornis
strain_3	2019-01-24	27	f	4	Bracon_brevicornis
strain_3	2019-01-24	27	m	4	Bracon_brevicornis
strain_3	2019-01-28	27	tot	12	Bracon_brevicornis
strain_3	2019-01-28	27	f	7	Bracon_brevicornis
strain_3	2019-01-28	27	m	5	Bracon_brevicornis
strain_3	2019-01-29	27	tot	13	Bracon_brevicornis
strain_3	2019-01-29	27	f	8	Bracon_brevicornis
strain_3	2019-01-29	27	m	5	Bracon_brevicornis
strain_3	2019-01-29	27	tot	14	Bracon_brevicornis
strain_3	2019-01-29	27	f	8	Bracon_brevicornis
strain_3	2019-01-29	27	m	6	Bracon_brevicornis
strain_3	2019-01-29	27	tot	7	Bracon_brevicornis
strain_3	2019-01-29	27	f	2	Bracon_brevicornis
strain_3	2019-01-29	27	m	5	Bracon_brevicornis
strain_3	2019-01-29	27	tot	13	Bracon_brevicornis
strain_3	2019-01-29	27	f	9	Bracon_brevicornis
strain_3	2019-01-29	27	m	4	Bracon_brevicornis
strain_3	2019-01-29	27	tot	7	Bracon_brevicornis
strain_3	2019-01-29	27	f	3	Bracon_brevicornis
strain_3	2019-01-29	27	m	4	Bracon_brevicornis
strain_3	2019-01-24	27	tot	3	Bracon_brevicornis
strain_3	2019-01-24	27	f	3	Bracon_brevicornis
strain_3	2019-01-24	27	m	0	Bracon_brevicornis
strain_3	2019-01-28	20	tot	11	Bracon_brevicornis
strain_3	2019-01-28	20	f	2	Bracon_brevicornis
strain_3	2019-01-28	20	m	9	Bracon_brevicornis
strain_3	2019-01-29	20	tot	12	Bracon_brevicornis
strain_3	2019-01-29	20	f	6	Bracon_brevicornis
strain_3	2019-01-29	20	m	6	Bracon_brevicornis
strain_3	2019-02-14	27	tot	4	Bracon_brevicornis
strain_3	2019-02-14	27	f	4	Bracon_brevicornis
strain_3	2019-02-14	27	m	0	Bracon_brevicornis
strain_3	2019-02-14	27	tot	13	Bracon_brevicornis
strain_3	2019-02-14	27	f	7	Bracon_brevicornis
strain_3	2019-02-14	27	m	6	Bracon_brevicornis
strain_3	2019-02-04	20	tot	14	Bracon_brevicornis
strain_3	2019-02-04	20	f	10	Bracon_brevicornis
strain_3	2019-02-04	20	m	4	Bracon_brevicornis
strain_3	2019-01-29	20	tot	6	Bracon_brevicornis
strain_3	2019-01-29	20	f	2	Bracon_brevicornis
strain_3	2019-01-29	20	m	4	Bracon_brevicornis
strain_3	2019-02-06	20	tot	3	Bracon_brevicornis
strain_3	2019-02-06	20	f	2	Bracon_brevicornis
strain_3	2019-02-06	20	m	1	Bracon_brevicornis
strain_3	2019-02-15	20	tot	9	Bracon_brevicornis
strain_3	2019-02-15	20	f	1	Bracon_brevicornis
strain_3	2019-02-15	20	m	8	Bracon_brevicornis
strain_3	2019-03-01	27	tot	5	Bracon_brevicornis
strain_3	2019-03-01	27	f	1	Bracon_brevicornis
strain_3	2019-03-01	27	m	4	Bracon_brevicornis
strain_3	2019-03-01	27	tot	11	Bracon_brevicornis
strain_3	2019-03-01	27	f	5	Bracon_brevicornis
strain_3	2019-03-01	27	m	6	Bracon_brevicornis
strain_3	2019-03-01	27	tot	7	Bracon_brevicornis
strain_3	2019-03-01	27	f	1	Bracon_brevicornis
strain_3	2019-03-01	27	m	6	Bracon_brevicornis
strain_3	2019-02-14	20	tot	9	Bracon_brevicornis
strain_3	2019-02-14	20	f	6	Bracon_brevicornis
strain_3	2019-02-14	20	m	3	Bracon_brevicornis
strain_3	2019-03-01	20	tot	10	Bracon_brevicornis
strain_3	2019-03-01	20	f	8	Bracon_brevicornis
strain_3	2019-03-01	20	m	2	Bracon_brevicornis
strain_3	2019-03-01	20	tot	9	Bracon_brevicornis
strain_3	2019-03-01	20	f	5	Bracon_brevicornis
strain_3	2019-03-01	20	m	4	Bracon_brevicornis
strain_3	2019-04-08	20	tot	6	Bracon_brevicornis
strain_3	2019-04-08	20	f	2	Bracon_brevicornis
strain_3	2019-04-08	20	m	4	Bracon_brevicornis
strain_4	2019-02-13	27	tot	8	Bracon_hebetor
strain_4	2019-02-13	27	f	4	Bracon_hebetor
strain_4	2019-02-13	27	m	4	Bracon_hebetor
strain_4	2019-02-13	27	tot	8	Bracon_hebetor
strain_4	2019-02-13	27	f	6	Bracon_hebetor
strain_4	2019-02-13	27	m	2	Bracon_hebetor
strain_4	2019-02-14	27	tot	11	Bracon_hebetor
strain_4	2019-02-14	27	f	5	Bracon_hebetor
strain_4	2019-02-14	27	m	6	Bracon_hebetor
strain_4	2019-02-06	20	tot	13	Bracon_hebetor
strain_4	2019-02-06	20	f	3	Bracon_hebetor
strain_4	2019-02-06	20	m	10	Bracon_hebetor
strain_4	2019-02-07	27	tot	18	Bracon_hebetor
strain_4	2019-02-07	27	f	12	Bracon_hebetor
strain_4	2019-02-07	27	m	6	Bracon_hebetor
strain_4	2019-02-14	27	tot	10	Bracon_hebetor
strain_4	2019-02-14	27	f	5	Bracon_hebetor
strain_4	2019-02-14	27	m	5	Bracon_hebetor
strain_4	2019-02-13	27	tot	3	Bracon_hebetor
strain_4	2019-02-13	27	f	1	Bracon_hebetor
strain_4	2019-02-13	27	m	2	Bracon_hebetor
strain_4	2019-02-04	20	tot	17	Bracon_hebetor
strain_4	2019-02-04	20	f	4	Bracon_hebetor
strain_4	2019-02-04	20	m	13	Bracon_hebetor
strain_4	2019-02-05	27	tot	13	Bracon_hebetor
strain_4	2019-02-05	27	f	5	Bracon_hebetor
strain_4	2019-02-05	27	m	8	Bracon_hebetor
strain_4	2019-02-06	20	tot	20	Bracon_hebetor
strain_4	2019-02-06	20	f	3	Bracon_hebetor
strain_4	2019-02-06	20	m	17	Bracon_hebetor
strain_4	2019-02-05	27	tot	6	Bracon_hebetor
strain_4	2019-02-05	27	f	5	Bracon_hebetor
strain_4	2019-02-05	27	m	1	Bracon_hebetor
strain_4	2019-02-18	27	tot	4	Bracon_hebetor
strain_4	2019-02-18	27	f	1	Bracon_hebetor
strain_4	2019-02-18	27	m	3	Bracon_hebetor
strain_4	2019-02-04	20	tot	11	Bracon_hebetor
strain_4	2019-02-04	20	f	5	Bracon_hebetor
strain_4	2019-02-04	20	m	6	Bracon_hebetor
strain_4	2019-02-14	20	tot	7	Bracon_hebetor
strain_4	2019-02-14	20	f	2	Bracon_hebetor
strain_4	2019-02-14	20	m	5	Bracon_hebetor
strain_4	2019-02-15	20	tot	13	Bracon_hebetor
strain_4	2019-02-15	20	f	5	Bracon_hebetor
strain_4	2019-02-15	20	m	8	Bracon_hebetor
strain_4	2019-02-04	20	tot	7	Bracon_hebetor
strain_4	2019-02-04	20	f	2	Bracon_hebetor
strain_4	2019-02-04	20	m	5	Bracon_hebetor
strain_4	2019-03-01	27	tot	10	Bracon_hebetor
strain_4	2019-03-01	27	f	6	Bracon_hebetor
strain_4	2019-03-01	27	m	4	Bracon_hebetor
strain_4	2019-03-01	27	tot	7	Bracon_hebetor
strain_4	2019-03-01	27	f	2	Bracon_hebetor
strain_4	2019-03-01	27	m	5	Bracon_hebetor
strain_4	2019-02-15	20	tot	7	Bracon_hebetor
strain_4	2019-02-15	20	f	1	Bracon_hebetor
strain_4	2019-02-15	20	m	6	Bracon_hebetor
strain_4	2019-02-14	20	tot	9	Bracon_hebetor
strain_4	2019-02-14	20	f	2	Bracon_hebetor
strain_4	2019-02-14	20	m	7	Bracon_hebetor
strain_4	2019-03-01	20	tot	12	Bracon_hebetor
strain_4	2019-03-01	20	f	6	Bracon_hebetor
strain_4	2019-03-01	20	m	6	Bracon_hebetor
strain_4	2019-03-01	20	tot	13	Bracon_hebetor
strain_4	2019-03-01	20	f	6	Bracon_hebetor
strain_4	2019-03-01	20	m	7	Bracon_hebetor
strain_4	2019-03-01	20	tot	5	Bracon_hebetor
strain_4	2019-03-01	20	f	1	Bracon_hebetor
strain_4	2019-03-01	20	m	4	Bracon_hebetor
strain_5	2019-02-06	27	tot	9	Bracon_hebetor
strain_5	2019-02-06	27	f	4	Bracon_hebetor
strain_5	2019-02-06	27	m	5	Bracon_hebetor
strain_5	2019-02-07	27	tot	12	Bracon_hebetor
strain_5	2019-02-07	27	f	7	Bracon_hebetor
strain_5	2019-02-07	27	m	5	Bracon_hebetor
strain_5	2019-02-07	27	tot	12	Bracon_hebetor
strain_5	2019-02-07	27	f	4	Bracon_hebetor
strain_5	2019-02-07	27	m	8	Bracon_hebetor
strain_5	2019-02-14	27	tot	9	Bracon_hebetor
strain_5	2019-02-14	27	f	6	Bracon_hebetor
strain_5	2019-02-14	27	m	3	Bracon_hebetor
strain_5	2019-02-14	27	tot	11	Bracon_hebetor
strain_5	2019-02-14	27	f	6	Bracon_hebetor
strain_5	2019-02-14	27	m	5	Bracon_hebetor
strain_5	2019-02-14	27	tot	10	Bracon_hebetor
strain_5	2019-02-14	27	f	3	Bracon_hebetor
strain_5	2019-02-14	27	m	7	Bracon_hebetor
strain_5	2019-02-04	20	tot	16	Bracon_hebetor
strain_5	2019-02-04	20	f	7	Bracon_hebetor
strain_5	2019-02-04	20	m	9	Bracon_hebetor
strain_5	2019-02-05	27	tot	8	Bracon_hebetor
strain_5	2019-02-05	27	f	4	Bracon_hebetor
strain_5	2019-02-05	27	m	4	Bracon_hebetor
strain_5	2019-02-04	20	tot	8	Bracon_hebetor
strain_5	2019-02-04	20	f	1	Bracon_hebetor
strain_5	2019-02-04	20	m	7	Bracon_hebetor
strain_5	2019-03-01	27	tot	16	Bracon_hebetor
strain_5	2019-03-01	27	f	9	Bracon_hebetor
strain_5	2019-03-01	27	m	7	Bracon_hebetor
strain_5	2019-02-15	20	tot	12	Bracon_hebetor
strain_5	2019-02-15	20	f	5	Bracon_hebetor
strain_5	2019-02-15	20	m	7	Bracon_hebetor
strain_5	2019-03-01	27	tot	13	Bracon_hebetor
strain_5	2019-03-01	27	f	10	Bracon_hebetor
strain_5	2019-03-01	27	m	3	Bracon_hebetor
strain_5	2019-03-01	27	tot	11	Bracon_hebetor
strain_5	2019-03-01	27	f	8	Bracon_hebetor
strain_5	2019-03-01	27	m	3	Bracon_hebetor
strain_5	2019-03-01	27	tot	6	Bracon_hebetor
strain_5	2019-03-01	27	f	3	Bracon_hebetor
strain_5	2019-03-01	27	m	3	Bracon_hebetor
strain_5	2019-03-01	20	tot	9	Bracon_hebetor
strain_5	2019-03-01	20	f	4	Bracon_hebetor
strain_5	2019-03-01	20	m	5	Bracon_hebetor
strain_5	2019-03-01	20	tot	4	Bracon_hebetor
strain_5	2019-03-01	20	f	2	Bracon_hebetor
strain_5	2019-03-01	20	m	2	Bracon_hebetor
strain_5	2019-03-01	20	tot	4	Bracon_hebetor
strain_5	2019-03-01	20	f	1	Bracon_hebetor
strain_5	2019-03-01	20	m	3	Bracon_hebetor
strain_5	2019-03-01	20	tot	12	Bracon_hebetor
strain_5	2019-03-01	20	f	7	Bracon_hebetor
strain_5	2019-03-01	20	m	5	Bracon_hebetor
strain_1	2019-06-11	36	tot	9	Bracon_hebetor
strain_1	2019-06-11	36	f	1	Bracon_hebetor
strain_1	2019-06-11	36	m	8	Bracon_hebetor
strain_2	2019-06-11	36	tot	9	Bracon_brevicornis
strain_2	2019-06-11	36	f	1	Bracon_brevicornis
strain_2	2019-06-11	36	m	8	Bracon_brevicornis
strain_2	2019-06-11	36	tot	6	Bracon_brevicornis
strain_2	2019-06-11	36	f	4	Bracon_brevicornis
strain_2	2019-06-11	36	m	2	Bracon_brevicornis
strain_2	2019-06-11	36	tot	3	Bracon_brevicornis
strain_2	2019-06-11	36	f	1	Bracon_brevicornis
strain_2	2019-06-11	36	m	2	Bracon_brevicornis
strain_2	2019-06-11	36	tot	5	Bracon_brevicornis
strain_2	2019-06-11	36	f	2	Bracon_brevicornis
strain_2	2019-06-11	36	m	3	Bracon_brevicornis
strain_2	2019-06-11	36	tot	1	Bracon_brevicornis
strain_2	2019-06-11	36	f	1	Bracon_brevicornis
strain_2	2019-06-11	36	m	0	Bracon_brevicornis
strain_3	2019-06-11	36	tot	1	Bracon_brevicornis
strain_3	2019-06-11	36	f	0	Bracon_brevicornis
strain_3	2019-06-11	36	m	1	Bracon_brevicornis
strain_4	2019-06-11	36	tot	2	Bracon_hebetor
strain_4	2019-06-11	36	f	0	Bracon_hebetor
strain_4	2019-06-11	36	m	2	Bracon_hebetor
strain_4	2019-06-11	36	tot	1	Bracon_hebetor
strain_4	2019-06-11	36	f	0	Bracon_hebetor
strain_4	2019-06-11	36	m	1	Bracon_hebetor
strain_2	2019-06-11	36	tot	5	Bracon_brevicornis
strain_2	2019-06-11	36	f	2	Bracon_brevicornis
strain_2	2019-06-11	36	m	3	Bracon_brevicornis
strain_2	2019-06-11	36	tot	1	Bracon_brevicornis
strain_2	2019-06-11	36	f	1	Bracon_brevicornis
strain_2	2019-06-11	36	m	0	Bracon_brevicornis
strain_2	2019-06-11	36	tot	1	Bracon_brevicornis
strain_2	2019-06-11	36	f	0	Bracon_brevicornis
strain_2	2019-06-11	36	m	1	Bracon_brevicornis
strain_1	2019-06-11	36	tot	9	Bracon_hebetor
strain_1	2019-06-11	36	f	1	Bracon_hebetor
strain_1	2019-06-11	36	m	8	Bracon_hebetor
strain_2	2019-06-11	36	tot	9	Bracon_brevicornis
strain_2	2019-06-11	36	f	1	Bracon_brevicornis
strain_2	2019-06-11	36	m	8	Bracon_brevicornis
strain_2	2019-06-11	36	tot	6	Bracon_brevicornis
strain_2	2019-06-11	36	f	4	Bracon_brevicornis
strain_2	2019-06-11	36	m	2	Bracon_brevicornis
strain_2	2019-06-11	36	tot	3	Bracon_brevicornis
strain_2	2019-06-11	36	f	1	Bracon_brevicornis
strain_2	2019-06-11	36	m	2	Bracon_hebetor
strain_4	2019-06-11	36	tot	3	Bracon_hebetor
strain_4	2019-06-11	36	f	0	Bracon_hebetor
strain_4	2019-06-11	36	m	3	Bracon_hebetor
