# Supplementary material for: Bracon wasps for ecological pest control–a laboratory experiment
Source: PeerJ. 2021 May 27;9:e11540. doi: 10.7717/peerj.11540 (PMC8164837; doi:10.7717/peerj.11540)
Supplement: Supplemental Information 4 [file peerj-09-11540-s004.xlsx]

## Sheet: Appendix3
Appendix 4 Raw data for experiments of Bracon species on different numbers of host larvae.
Strain	Date	Temperature	Number_host	Offspring	Offspring_female	Offspring_male	Species	Pupae	Developed_larvae	Living_Larvae	paralysed	paralysed1
control	2019-03-15	12	5	0	0	0	control	5	0	0	0	0
control	2019-03-19	12	5	0	0	0	control	0	0	0	0	0
control	2019-04-26	12	5	0	0	0	control	0	0	0	0	0
strain_1	2019-03-15	12	5	0	0	0	Bracon_hebetor	1	0	0	0	0
strain_1	2019-03-15	12	5	0	0	0	Bracon_hebetor	0	0	0	0	0
strain_1	2019-03-15	12	5	0	0	0	Bracon_hebetor	0	0	0	0	0
strain_1	2019-03-15	12	5	0	0	0	Bracon_hebetor	0	0	0	0	0
strain_1	2019-03-15	12	5	0	0	0	Bracon_hebetor	1	0	0	0	0
strain_2	2019-03-21	12	5	0	0	0	Bracon_brevicornis	0	0	0	5	1
strain_2	2019-03-21	12	5	0	0	0	Bracon_brevicornis	0	0	0	5	1
strain_2	2019-03-21	12	5	0	0	0	Bracon_brevicornis	0	0	0	5	1
strain_2	2019-03-21	12	5	0	0	0	Bracon_brevicornis	2	0	0	3	0.6
strain_2	2019-04-02	12	5	0	0	0	Bracon_brevicornis	2	0	0	3	0.6
strain_2	2019-04-02	12	5	0	0	0	Bracon_brevicornis	0	0	0	5	1
strain_2	2019-04-02	12	5	0	0	0	Bracon_brevicornis	0	0	0	5	1
strain_2	2019-04-02	12	5	0	0	0	Bracon_brevicornis	0	0	0	5	1
strain_2	2019-04-02	12	5	0	0	0	Bracon_brevicornis	1	0	0	4	0.8
strain_3	2019-04-26	12	5	0	0	0	Bracon_brevicornis	0	0	0	5	1
strain_3	2019-04-26	12	5	0	0	0	Bracon_brevicornis	0	0	0	5	1
strain_3	2019-04-26	12	5	0	0	0	Bracon_brevicornis	0	0	0	5	1
strain_3	2019-04-26	12	5	0	0	0	Bracon_brevicornis	1	0	0	4	0.8
strain_3	2019-04-26	12	5	0	0	0	Bracon_brevicornis	0	0	0	5	1
strain_3	2019-04-26	12	5	0	0	0	Bracon_brevicornis	0	0	0	5	1
strain_3	2019-04-26	12	5	0	0	0	Bracon_brevicornis	0	0	0	5	1
strain_4	2019-04-26	12	5	0	0	0	Bracon_hebetor	0	0	0	5	1
strain_4	2019-04-26	12	5	0	0	0	Bracon_hebetor	0	0	0	5	1
strain_4	2019-04-26	12	5	0	0	0	Bracon_hebetor	0	0	0	5	1
strain_4	2019-04-26	12	5	0	0	0	Bracon_hebetor	2	0	0	3	0.6
strain_4	2019-04-26	12	5	0	0	0	Bracon_hebetor	0	0	0	5	1
strain_4	2019-04-26	12	5	0	0	0	Bracon_hebetor	2	0	0	3	0.6
strain_5	2019-03-21	12	5	0	0	0	Bracon_hebetor	0	0	0	5	1
strain_5	2019-03-21	12	5	0	0	0	Bracon_hebetor	1	0	0	4	0.8
strain_5	2019-03-21	12	5	0	0	0	Bracon_hebetor	0	0	0	5	1
strain_5	2019-03-21	12	5	0	0	0	Bracon_hebetor	0	0	0	5	1
strain_5	2019-03-26	12	5	0	0	0	Bracon_hebetor	0	0	0	5	1
control	2019-03-01	20	5	0	0	0	control	0	2	0	3	0.6
control	2019-04-04	20	5	0	0	0	control	2	3	0	0	0
strain_1	2019-03-04	20	5	17	10	7	Bracon_hebetor	0	0	0	5	1
strain_1	2019-03-04	20	5	9	3	6	Bracon_hebetor	0	0	0	5	1
strain_1	2019-03-04	20	5	12	4	8	Bracon_hebetor	0	0	0	5	1
strain_1	2019-03-04	20	5	18	11	7	Bracon_hebetor	0	0	0	5	1
strain_1	2019-03-04	20	5	5	1	4	Bracon_hebetor	0	0	0	5	1
strain_2	2019-03-21	20	5	19	0	19	Bracon_brevicornis	0	0	0	5	1
strain_2	2019-03-21	20	5	9	0	9	Bracon_brevicornis	0	0	0	5	1
strain_2	2019-03-21	20	5	14	9	5	Bracon_brevicornis	0	0	0	5	1
strain_2	2019-03-21	20	5	1	0	1	Bracon_brevicornis	0	0	0	5	1
strain_2	2019-04-08	20	5	32	0	32	Bracon_brevicornis	0	0	0	5	1
strain_2	2019-03-21	20	5	27	0	27	Bracon_brevicornis	0	0	0	5	1
strain_2	2019-04-02	20	5	7	1	6	Bracon_brevicornis	0	0	10	-5	0
strain_2	2019-04-02	20	5	11	0	11	Bracon_brevicornis	0	0	0	5	1
strain_2	2019-04-02	20	5	15	9	6	Bracon_brevicornis	0	0	0	5	1
strain_2	2019-04-02	20	5	18	0	18	Bracon_brevicornis	0	0	0	5	1
strain_2	2019-04-02	20	5	23	12	11	Bracon_brevicornis	0	0	NA	NA	NA
strain_2	2019-04-02	20	5	24	5	19	Bracon_brevicornis	0	0	NA	NA	NA
strain_3	2019-03-04	20	5	18	11	7	Bracon_brevicornis	0	0	2	3	0.6
strain_3	2019-03-04	20	5	12	3	9	Bracon_brevicornis	0	0	1	4	0.8
strain_3	2019-03-04	20	5	8	6	2	Bracon_brevicornis	0	0	0	5	1
strain_3	2019-03-04	20	5	11	5	6	Bracon_brevicornis	0	0	0	5	1
strain_3	2019-03-15	20	5	6	4	2	Bracon_brevicornis	0	0	0	5	1
strain_3	2019-03-15	20	5	9	5	4	Bracon_brevicornis	0	0	0	5	1
strain_3	2019-03-21	20	5	12	0	12	Bracon_brevicornis	0	0	0	5	1
strain_3	2019-03-21	20	5	12	0	12	Bracon_brevicornis	0	0	NA	NA	NA
strain_3	2019-03-21	20	5	19	10	9	Bracon_brevicornis	0	0	0	5	1
strain_3	2019-04-29	20	5	9	2	7	Bracon_brevicornis	1	0	0	4	0.8
strain_4	2019-03-04	20	5	29	19	10	Bracon_hebetor	0	0	0	5	1
strain_4	2019-03-04	20	5	4	3	1	Bracon_hebetor	0	0	0	5	1
strain_4	2019-03-04	20	5	8	4	4	Bracon_hebetor	0	0	0	5	1
strain_4	2019-03-04	20	5	10	2	8	Bracon_hebetor	0	0	0	5	1
strain_4	2019-03-04	20	5	3	0	3	Bracon_hebetor	0	0	0	5	1
strain_5	2019-03-04	20	5	2	2	0	Bracon_hebetor	0	0	0	5	1
strain_5	2019-03-04	20	5	17	11	6	Bracon_hebetor	0	0	0	5	1
strain_5	2019-03-21	20	5	21	12	9	Bracon_hebetor	0	0	0	5	1
strain_5	2019-03-21	20	5	19	0	19	Bracon_hebetor	0	1	0	4	0.8
strain_5	2019-03-21	20	5	21	11	10	Bracon_hebetor	0	0	0	5	1
strain_5	2019-03-21	20	5	41	1	40	Bracon_hebetor	0	0	0	5	1
control	2019-03-01	27	5	0	0	0	control	0	4	0	5	1
control	2019-04-04	27	5	0	0	0	control	0	3	1	4	0.8
strain_1	2019-01-11	27	5	NA	NA	NA	Bracon_hebetor	NA	NA	1	NA	NA
strain_1	2019-01-11	27	5	33	17	16	Bracon_hebetor	0	0	0	5	1
strain_1	2019-01-21	27	5	28	12	16	Bracon_hebetor	0	0	3	2	0.4
strain_1	2019-01-11	27	5	NA	NA	NA	Bracon_hebetor	NA	NA	0	NA	NA
strain_1	2019-01-11	27	5	33	17	16	Bracon_hebetor	0	0	1	4	0.8
strain_1	2019-01-21	27	5	28	12	16	Bracon_hebetor	0	0	0	5	1
strain_1	2019-01-31	27	5	32	0	32	Bracon_hebetor	0	0	9	-4	0
strain_1	2019-01-31	27	5	39	18	21	Bracon_hebetor	0	0	5	0	0
strain_2	2019-01-11	27	5	15	1	14	Bracon_brevicornis	0	0	0	5	1
strain_2	2019-01-11	27	5	NA	NA	NA	Bracon_brevicornis	NA	NA	0	NA	NA
strain_2	2019-01-21	27	5	9	9	0	Bracon_brevicornis	0	0	0	5	1
strain_2	2019-01-21	27	5	28	11	17	Bracon_brevicornis	0	0	0	5	1
strain_2	2019-04-08	27	5	26	11	15	Bracon_brevicornis	0	0	0	5	1
strain_2	2019-04-08	27	5	36	29	7	Bracon_brevicornis	0	0	0	5	1
strain_2	2019-04-08	27	5	29	14	15	Bracon_brevicornis	0	0	0	5	1
strain_2	2019-04-08	27	5	26	23	3	Bracon_brevicornis	0	0	0	5	1
strain_3	2019-01-11	27	5	25	0	25	Bracon_brevicornis	0	0	0	5	1
strain_3	2019-01-11	27	5	NA	NA	NA	Bracon_brevicornis	NA	NA	0	NA	NA
strain_3	2019-01-21	27	5	42	18	24	Bracon_brevicornis	0	0	0	5	1
strain_3	2019-01-21	27	5	22	11	11	Bracon_brevicornis	0	0	0	5	1
strain_3	2019-04-26	27	5	39	16	23	Bracon_brevicornis	0	0	0	5	1
strain_3	2019-04-26	27	5	27	5	22	Bracon_brevicornis	0	0	0	5	1
strain_3	2019-04-26	27	5	23	15	8	Bracon_brevicornis	0	0	0	5	1
strain_3	2019-04-26	27	5	47	0	47	Bracon_brevicornis	0	0	0	5	1
strain_3	2019-04-26	27	5	11	4	7	Bracon_brevicornis	0	0	0	5	1
strain_3	2019-04-26	27	5	27	16	11	Bracon_brevicornis	0	0	0	5	1
strain_3	2019-04-26	27	5	42	0	42	Bracon_brevicornis	0	0	0	5	1
strain_4	2019-01-11	27	5	32	20	12	Bracon_hebetor	0	0	7	-2	0
strain_4	2019-01-11	27	5	NA	NA	NA	Bracon_hebetor	0	0	1	4	0.8
strain_4	2019-03-01	27	5	33	0	33	Bracon_hebetor	0	0	0	5	1
strain_4	2019-03-01	27	5	29	15	14	Bracon_hebetor	0	0	1	4	0.8
strain_5	2019-03-26	27	5	52	26	26	Bracon_hebetor	0	0	7	-2	0
strain_5	2019-05-31	27	5	36	1	35	Bracon_hebetor	0	0	0	5	1
strain_5	2019-05-31	27	5	11	0	11	Bracon_hebetor	0	0	0	5	1
strain_5	2019-05-31	27	5	19	0	19	Bracon_hebetor	0	0	0	5	1
strain_2	2019-05-31	36	5	5	3	2	Bracon_brevicornis	0	0	0	5	1
strain_2	2019-05-31	36	5	6	4	2	Bracon_brevicornis	0	0	0	5	1
strain_2	2019-06-11	36	5	1	0	1	Bracon_brevicornis	0	0	0	5	1
strain_2	2019-06-11	36	5	10	0	10	Bracon_brevicornis	0	0	0	5	1
strain_4	2019-06-11	36	5	2	1	1	Bracon_hebetor	0	0	0	5	1
strain_4	2019-06-11	36	5	3	1	2	Bracon_hebetor	0	0	0	5	1
strain_2	2019-06-11	36	5	0	0	0	Bracon_brevicornis	0	0	0	5	1
strain_2	2019-06-11	36	5	0	0	0	Bracon_brevicornis	0	0	0	5	1
strain_3	2019-06-11	36	5	0	0	0	Bracon_brevicornis	0	0	0	5	1
strain_3	2019-06-11	36	5	0	0	0	Bracon_brevicornis	0	0	0	5	1
strain_1	2019-06-11	36	5	0	0	0	Bracon_hebetor	0	0	0	5	1
strain_5	2019-05-31	36	5	0	0	0	Bracon_hebetor	0	0	0	5	1
strain_5	2019-05-31	36	5	0	0	0	Bracon_hebetor	0	0	0	5	1
strain_5	2019-05-31	36	5	0	0	0	Bracon_hebetor	0	0	0	5	1
strain_4	2019-05-31	36	5	0	0	0	Bracon_hebetor	0	0	0	5	1
strain_4	2019-05-31	36	5	0	0	0	Bracon_hebetor	0	0	0	5	1
strain_4	2019-05-31	36	5	0	0	0	Bracon_hebetor	0	0	0	5	1
strain_4	2019-05-31	36	5	0	0	0	Bracon_hebetor	0	0	0	5	1
strain_1	2019-06-11	36	5	0	0	0	Bracon_hebetor	0	0	0	5	1
strain_1	2019-06-11	36	5	0	0	0	Bracon_hebetor	0	0	0	5	1
strain_1	2019-06-11	36	5	0	0	0	Bracon_hebetor	0	0	0	5	1
strain_1	2019-06-11	36	5	0	0	0	Bracon_hebetor	0	0	0	5	1
strain_1	2019-05-31	36	5	0	0	0	Bracon_hebetor	0	0	0	5	1
strain_1	2019-05-31	36	5	0	0	0	Bracon_hebetor	0	0	0	5	1
strain_2	2019-06-11	36	5	0	0	0	Bracon_brevicornis	0	0	0	5	1
strain_2	2019-06-11	36	5	0	0	0	Bracon_brevicornis	0	0	0	5	1
strain_2	2019-06-11	36	5	0	0	0	Bracon_brevicornis	0	0	0	5	1
strain_2	2019-06-11	36	5	0	0	0	Bracon_brevicornis	0	0	0	5	1
strain_2	2019-06-11	36	5	0	0	0	Bracon_brevicornis	0	0	0	5	1
strain_3	2019-06-11	36	5	0	0	0	Bracon_brevicornis	0	0	0	5	1
strain_3	2019-06-11	36	5	0	0	0	Bracon_brevicornis	0	0	0	5	1
strain_3	2019-06-11	36	5	0	0	0	Bracon_brevicornis	0	0	0	5	1
strain_3	2019-06-11	36	5	0	0	0	Bracon_brevicornis	0	0	0	5	1
strain_3	2019-06-11	36	5	0	0	0	Bracon_brevicornis	0	0	0	5	1
strain_4	2019-06-11	36	5	0	0	0	Bracon_hebetor	0	0	0	5	1
strain_5	2019-06-11	36	5	0	0	0	Bracon_hebetor	0	0	1	5	1
strain_5	2019-06-11	36	5	0	0	0	Bracon_hebetor	0	0	1	5	1
strain_5	2019-06-11	36	5	0	0	0	Bracon_hebetor	0	0	0	5	1
strain_5	2019-06-11	36	5	0	0	0	Bracon_hebetor	0	0	0	5	1
control	2019-03-15	12	10	0	0	0	control	0	0	0	0	0
control	2019-03-19	12	10	0	0	0	control	1	0	0	0	0
control	2019-04-26	12	10	0	0	0	control	0	0	0	0	0
strain_1	2019-03-19	12	10	0	0	0	Bracon_hebetor	0	0	0	0	0
strain_1	2019-03-19	12	10	0	0	0	Bracon_hebetor	2	0	0	0	0
strain_1	2019-03-19	12	10	0	0	0	Bracon_hebetor	0	0	0	0	0
strain_1	2019-03-19	12	10	0	0	0	Bracon_hebetor	1	0	0	0	0
strain_1	2019-03-19	12	10	0	0	0	Bracon_hebetor	0	0	0	0	0
strain_2	2019-03-15	12	10	0	0	0	Bracon_brevicornis	1	0	0	9	0.9
strain_2	2019-03-15	12	10	0	0	0	Bracon_brevicornis	1	0	0	9	0.9
strain_2	2019-03-15	12	10	0	0	0	Bracon_brevicornis	1	0	NA	NA	NA
strain_2	2019-03-15	12	10	0	0	0	Bracon_brevicornis	0	0	0	10	1
strain_2	2019-03-15	12	10	0	0	0	Bracon_brevicornis	0	0	0	10	1
strain_2	2019-04-02	12	10	0	0	0	Bracon_brevicornis	5	0	0	5	0.5
strain_2	2019-04-02	12	10	0	0	0	Bracon_brevicornis	1	0	0	9	0.9
strain_2	2019-04-02	12	10	0	0	0	Bracon_brevicornis	6	0	0	4	0.4
strain_2	2019-04-02	12	10	0	0	0	Bracon_brevicornis	0	0	0	10	1
strain_2	2019-04-02	12	10	0	0	0	Bracon_brevicornis	1	0	0	9	0.9
strain_3	2019-04-26	12	10	0	0	0	Bracon_brevicornis	0	0	0	10	1
strain_3	2019-04-26	12	10	0	0	0	Bracon_brevicornis	0	0	0	10	1
strain_3	2019-04-26	12	10	0	0	0	Bracon_brevicornis	1	0	0	9	0.9
strain_3	2019-04-26	12	10	0	0	0	Bracon_brevicornis	0	0	0	10	1
strain_3	2019-04-26	12	10	0	0	0	Bracon_brevicornis	0	0	0	10	1
strain_3	2019-04-26	12	10	0	0	0	Bracon_brevicornis	1	0	0	9	0.9
strain_3	2019-04-26	12	10	0	0	0	Bracon_brevicornis	0	0	0	10	1
strain_4	2019-04-26	12	10	0	0	0	Bracon_hebetor	0	0	0	10	1
strain_4	2019-04-26	12	10	0	0	0	Bracon_hebetor	0	0	0	10	1
strain_4	2019-04-26	12	10	0	0	0	Bracon_hebetor	1	0	0	9	0.9
strain_4	2019-04-26	12	10	0	0	0	Bracon_hebetor	0	0	NA	NA	NA
strain_5	2019-03-23	12	10	0	0	0	Bracon_hebetor	1	0	0	9	0.9
strain_5	2019-03-23	12	10	0	0	0	Bracon_hebetor	3	0	0	7	0.7
strain_5	2019-03-23	12	10	0	0	0	Bracon_hebetor	4	0	0	6	0.6
strain_5	2019-03-23	12	10	0	0	0	Bracon_hebetor	1	0	0	9	0.9
strain_5	2019-03-23	12	10	0	0	0	Bracon_hebetor	2	0	0	8	0.8
control	2019-03-01	20	10	0	0	0	control	0	7	0	3	0.3
control	2019-03-01	20	10	0	0	0	control	0	9	0	1	0.1
control	2019-04-04	20	10	0	0	0	control	3	7	0	0	0
strain_1	2019-03-04	20	10	23	5	18	Bracon_hebetor	0	0	0	10	1
strain_1	2019-03-04	20	10	13	3	10	Bracon_hebetor	0	2	0	8	0.8
strain_1	2019-03-04	20	10	13	5	8	Bracon_hebetor	0	0	0	10	1
strain_1	2019-03-04	20	10	13	3	10	Bracon_hebetor	0	0	0	10	1
strain_1	2019-03-15	20	10	19	9	10	Bracon_hebetor	0	0	0	10	1
strain_2	2019-03-21	20	10	17	0	17	Bracon_brevicornis	0	0	0	10	1
strain_2	2019-03-21	20	10	8	7	1	Bracon_brevicornis	0	0	0	10	1
strain_2	2019-03-21	20	10	8	0	8	Bracon_brevicornis	0	0	0	10	1
strain_2	2019-04-08	20	10	37	0	37	Bracon_brevicornis	0	0	0	10	1
strain_2	2019-04-08	20	10	35	12	23	Bracon_brevicornis	0	0	0	10	1
strain_2	2019-04-08	20	10	33	14	19	Bracon_brevicornis	0	0	0	10	1
strain_2	2019-04-08	20	10	35	17	18	Bracon_brevicornis	0	0	0	10	1
strain_2	2019-04-08	20	10	19	0	19	Bracon_brevicornis	0	0	0	10	1
strain_2	2019-03-21	20	10	13	7	6	Bracon_brevicornis	0	0	0	10	1
strain_2	2019-04-15	20	10	9	0	9	Bracon_brevicornis	0	0	0	23	1
strain_2	2019-04-15	20	10	15	0	15	Bracon_brevicornis	0	0	1	12	1
strain_2	2019-04-15	20	10	21	0	21	Bracon_brevicornis	0	0	0	14	1
strain_2	2019-04-16	20	10	10	0	10	Bracon_brevicornis	0	0	0	13	1
strain_3	2019-03-21	20	10	17	11	6	Bracon_brevicornis	0	0	0	10	1
strain_3	2019-03-21	20	10	11	0	11	Bracon_brevicornis	0	0	0	10	1
strain_3	2019-03-21	20	10	8	5	3	Bracon_brevicornis	0	1	NA	NA	NA
strain_3	2019-03-21	20	10	6	0	6	Bracon_brevicornis	0	0	NA	NA	NA
strain_3	2019-03-28	20	10	5	3	2	Bracon_brevicornis	0	1	0	9	0.9
strain_3	2019-04-29	20	10	1	0	1	Bracon_brevicornis	0	0	0	10	1
strain_3	2019-04-29	20	10	19	8	11	Bracon_brevicornis	0	0	0	10	1
strain_3	2019-04-29	20	10	21	9	12	Bracon_brevicornis	1	0	0	9	0.9
strain_4	2019-03-04	20	10	13	1	12	Bracon_hebetor	0	0	0	10	1
strain_4	2019-03-28	20	10	9	0	9	Bracon_hebetor	0	1	0	9	0.9
strain_4	2019-03-28	20	10	9	0	9	Bracon_hebetor	0	0	0	10	1
strain_5	2019-03-04	20	10	17	12	5	Bracon_hebetor	0	0	0	10	1
strain_5	2019-03-04	20	10	7	5	2	Bracon_hebetor	0	0	0	10	1
strain_5	2019-03-21	20	10	14	8	6	Bracon_hebetor	0	0	0	10	1
strain_5	2019-03-21	20	10	24	19	5	Bracon_hebetor	0	0	0	10	1
strain_5	2019-03-21	20	10	20	3	17	Bracon_hebetor	0	0	0	10	1
strain_5	2019-03-21	20	10	38	14	24	Bracon_hebetor	0	0	0	10	1
strain_5	2019-03-21	20	10	48	29	19	Bracon_hebetor	0	0	0	10	1
strain_5	2019-03-19	20	10	9	2	7	Bracon_hebetor	0	0	0	10	1
strain_5	2019-03-19	20	10	4	4	0	Bracon_hebetor	0	0	0	10	1
strain_5	2019-03-19	20	10	2	2	0	Bracon_hebetor	0	0	0	10	1
strain_5	2019-03-19	20	10	19	0	19	Bracon_hebetor	0	0	1	9	0.9
strain_5	2019-04-16	20	10	11	2	9	Bracon_hebetor	0	0	1	4	0.4
control	2019-03-01	27	10	0	0	0	control	0	7	0	10	1
control	2019-04-04	27	10	0	0	0	control	0	5	1	9	0.9
strain_1	2019-01-11	27	10	56	33	23	Bracon_hebetor	0	0	1	9	0.9
strain_1	2019-01-11	27	10	47	13	34	Bracon_hebetor	0	0	6	4	0.4
strain_1	2019-01-21	27	10	NA	NA	NA	Bracon_hebetor	1	0	8	1	0.1
strain_1	2019-01-21	27	10	NA	NA	NA	Bracon_hebetor	0	0	5	5	0.5
strain_1	2019-01-11	27	10	56	33	23	Bracon_hebetor	0	0	1	9	0.9
strain_1	2019-01-11	27	10	47	13	34	Bracon_hebetor	0	0	0	10	1
strain_1	2019-01-21	27	10	43	0	43	Bracon_hebetor	1	0	0	9	0.9
strain_1	2019-01-21	27	10	65	0	65	Bracon_hebetor	0	0	3	7	0.7
strain_1	2019-01-31	27	10	38	20	18	Bracon_hebetor	0	0	3	7	0.7
strain_1	2019-01-31	27	10	NA	NA	NA	Bracon_hebetor	0	0	5	5	0.5
strain_1		27	10	16	0	16	Bracon_hebetor	0	2	0	10	1
strain_2	2019-01-11	27	10	9	0	9	Bracon_brevicornis	0	0	0	10	1
strain_2	2019-01-11	27	10	NA	NA	NA	Bracon_brevicornis	NA	NA	0	NA	NA
strain_2	2019-01-21	27	10	67	59	8	Bracon_brevicornis	0	0	0	10	1
strain_2	2019-01-21	27	10	63	58	5	Bracon_brevicornis	0	0	0	10	1
strain_2	2019-04-08	27	10	29	14	15	Bracon_brevicornis	0	0	0	10	1
strain_2	2019-04-08	27	10	25	21	4	Bracon_brevicornis	0	0	0	10	1
strain_2	2019-04-08	27	10	24	0	24	Bracon_brevicornis	0	0	0	10	1
strain_2	2019-04-08	27	10	29	26	3	Bracon_brevicornis	0	0	0	10	1
strain_3	2019-01-11	27	10	30	12	18	Bracon_brevicornis	0	0	0	10	1
strain_3	2019-01-11	27	10	NA	NA	NA	Bracon_brevicornis	NA	NA	0	NA	NA
strain_3	2019-01-21	27	10	NA	NA	NA	Bracon_brevicornis	NA	NA	0	NA	NA
strain_3	2019-01-21	27	10	51	27	24	Bracon_brevicornis	0	0	0	10	1
strain_3	2019-01-31	27	10	52	29	23	Bracon_brevicornis	0	0	0	10	1
strain_3	2019-01-31	27	10	24	18	6	Bracon_brevicornis	0	0	0	10	1
strain_3	2019-04-26	27	10	46	23	23	Bracon_brevicornis	0	0	0	10	1
strain_3	2019-04-26	27	10	38	0	38	Bracon_brevicornis	0	0	0	10	1
strain_3	2019-04-26	27	10	42	7	35	Bracon_brevicornis	0	0	0	10	1
strain_3	2019-04-26	27	10	47	24	23	Bracon_brevicornis	0	0	0	10	1
strain_3	2019-04-26	27	10	50	38	12	Bracon_brevicornis	0	0	0	10	1
strain_3	2019-04-26	27	10	74	38	36	Bracon_brevicornis	0	0	0	10	1
strain_4	2019-01-11	27	10	36	1	35	Bracon_hebetor	0	1	3	7	0.7
strain_4	2019-01-11	27	10	36	0	36	Bracon_hebetor	0	0	7	3	0.3
strain_4	2019-02-07	27	10	80	58	22	Bracon_hebetor	0	0	0	10	1
strain_4	2019-02-07	27	10	49	21	28	Bracon_hebetor	0	0	0	10	1
strain_4	2019-02-07	27	10	34	24	10	Bracon_hebetor	0	1	8	2	0.2
strain_4	2019-02-07	27	10	50	22	28	Bracon_hebetor	0	0	1	9	0.9
strain_5	2019-01-31	27	10	21	0	21	Bracon_hebetor	0	0	7	3	0.3
strain_5	2019-02-07	27	10	61	37	24	Bracon_hebetor	0	0	5	5	0.5
strain_5	2019-02-04	27	10	66	0	66	Bracon_hebetor	0	1	0	10	1
strain_5	2019-03-26	27	10	92	0	92	Bracon_hebetor	0	0	9	1	0.1
strain_5	2019-05-31	27	10	32	2	30	Bracon_hebetor	0	0	0	10	1
strain_4	2019-05-31	36	10	2	1	1	Bracon_hebetor	0	0	0	10	1
strain_1	2019-06-11	36	10	1	1	0	Bracon_hebetor	0	0	0	10	1
strain_2	2019-06-11	36	10	2	0	2	Bracon_brevicornis	0	0	0	10	1
strain_4	2019-06-11	36	10	3	2	1	Bracon_hebetor	0	0	0	10	1
strain_5	2019-06-11	36	10	1	1	0	Bracon_hebetor	0	0	0	10	1
strain_2	2019-06-11	36	10	0	0	0	Bracon_brevicornis	0	0	0	10	1
strain_1	2019-06-11	36	10	0	0	0	Bracon_hebetor	0	0	0	10	1
strain_1	2019-05-31	36	10	0	0	0	Bracon_hebetor	0	0	0	10	1
strain_1	2019-05-31	36	10	0	0	0	Bracon_hebetor	0	0	0	10	1
strain_5	2019-05-31	36	10	0	0	0	Bracon_hebetor	0	0	0	10	1
strain_5	2019-05-31	36	10	0	0	0	Bracon_hebetor	0	0	0	10	1
strain_4	2019-05-31	36	10	0	0	0	Bracon_hebetor	0	0	0	10	1
strain_4	2019-05-31	36	10	0	0	0	Bracon_hebetor	0	0	0	10	1
strain_4	2019-05-31	36	10	0	0	0	Bracon_hebetor	0	0	0	10	1
strain_1	2019-06-11	36	10	0	0	0	Bracon_hebetor	0	0	0	10	1
strain_1	2019-06-11	36	10	0	0	0	Bracon_hebetor	0	0	0	10	1
strain_2	2019-06-11	36	10	0	0	0	Bracon_brevicornis	0	0	0	10	1
strain_2	2019-06-11	36	10	0	0	0	Bracon_brevicornis	0	0	0	10	1
strain_2	2019-06-11	36	10	0	0	0	Bracon_brevicornis	0	0	0	10	1
strain_2	2019-06-11	36	10	0	0	0	Bracon_brevicornis	0	0	0	10	1
strain_3	2019-06-11	36	10	0	0	0	Bracon_brevicornis	0	0	1	9	0.9
strain_3	2019-06-11	36	10	0	0	0	Bracon_brevicornis	0	0	1	9	0.9
strain_3	2019-06-11	36	10	0	0	0	Bracon_brevicornis	0	0	0	10	1
strain_4	2019-06-11	36	10	0	0	0	Bracon_hebetor	0	0	0	10	1
strain_4	2019-06-11	36	10	0	0	0	Bracon_hebetor	0	0	0	10	1
strain_4	2019-06-11	36	10	0	0	0	Bracon_hebetor	0	0	0	10	1
strain_5	2019-06-11	36	10	0	0	0	Bracon_hebetor	0	0	0	10	1
strain_5	2019-06-11	36	10	0	0	0	Bracon_hebetor	0	0	0	10	1
strain_4	2019-06-11	36	10	0	0	1	Bracon_hebetor	0	0	0	10	1
control	2019-03-15	12	15	0	0	0	control	0	0	0	0	0
control	2019-03-19	12	15	0	0	0	control	6	0	0	0	0
control	2019-04-26	12	15	0	0	0	control	0	0	0	0	0
strain_1	2019-03-19	12	15	0	0	0	Bracon_hebetor	0	0	0	0	0
strain_1	2019-03-19	12	15	0	0	0	Bracon_hebetor	0	0	0	0	0
strain_1	2019-03-19	12	15	0	0	0	Bracon_hebetor	0	0	0	0	0
strain_1	2019-03-19	12	15	0	0	0	Bracon_hebetor	1	0	0	0	0
strain_1	2019-03-19	12	15	0	0	0	Bracon_hebetor	0	0	0	0	0
strain_2	2019-04-02	12	15	0	0	0	Bracon_brevicornis	5	0	0	10	0.666667
strain_2	2019-04-02	12	15	0	0	0	Bracon_brevicornis	2	0	0	13	0.866667
strain_2	2019-04-02	12	15	0	0	0	Bracon_brevicornis	1	0	0	14	0.933333
strain_2	2019-04-02	12	15	0	0	0	Bracon_brevicornis	10	0	0	5	0.333333
strain_2	2019-04-02	12	15	0	0	0	Bracon_brevicornis	3	0	0	12	0.8
strain_2	2019-04-02	12	15	0	0	0	Bracon_brevicornis	1	0	0	14	0.933333
strain_2	2019-04-02	12	15	0	0	0	Bracon_brevicornis	2	0	0	13	0.866667
strain_2	2019-04-02	12	15	0	0	0	Bracon_brevicornis	5	0	0	10	0.666667
strain_3	2019-04-26	12	15	0	0	0	Bracon_brevicornis	0	0	0	15	1
strain_3	2019-04-26	12	15	0	0	0	Bracon_brevicornis	0	0	0	15	1
strain_3	2019-04-26	12	15	0	0	0	Bracon_brevicornis	0	0	0	15	1
strain_3	2019-04-26	12	15	0	0	0	Bracon_brevicornis	0	0	0	15	1
strain_3	2019-04-26	12	15	0	0	0	Bracon_brevicornis	1	0	0	14	0.933333
strain_3	2019-04-26	12	15	0	0	0	Bracon_brevicornis	1	0	0	14	0.933333
strain_3	2019-04-26	12	15	0	0	0	Bracon_brevicornis	0	0	0	15	1
strain_4	2019-04-26	12	15	0	0	0	Bracon_hebetor	0	0	0	15	1
strain_4	2019-04-26	12	15	0	0	0	Bracon_hebetor	0	0	0	15	1
strain_4	2019-04-26	12	15	0	0	0	Bracon_hebetor	1	0	0	14	0.933333
strain_4	2019-04-26	12	15	0	0	0	Bracon_hebetor	0	0	NA	NA	NA
strain_5	2019-03-15	12	15	0	0	0	Bracon_hebetor	2	0	0	13	0.866667
strain_5	2019-03-15	12	15	0	0	0	Bracon_hebetor	1	0	0	14	0.933333
strain_5	2019-03-15	12	15	0	0	0	Bracon_hebetor	2	0	0	13	0.866667
strain_5	2019-03-15	12	15	0	0	0	Bracon_hebetor	0	0	0	15	1
strain_5	2019-03-15	12	15	0	0	0	Bracon_hebetor	3	0	0	12	0.8
control	2019-03-01	20	15	0	0	0	control	0	3	0	12	0.8
control	2019-04-04	20	15	0	0	0	control	6	9	0	0	0
strain_1	2019-02-04	20	15	8	4	4	Bracon_hebetor	0	2	0	13	0.866667
strain_1	2019-03-04	20	15	23	23	0	Bracon_hebetor	0	0	0	15	1
strain_1	2019-03-04	20	15	11	5	6	Bracon_hebetor	0	0	0	15	1
strain_1	2019-03-04	20	15	15	14	1	Bracon_hebetor	0	1	0	14	0.933333
strain_1	2019-03-04	20	15	13	10	3	Bracon_hebetor	0	0	0	15	1
strain_2	2019-02-04	20	15	6	0	6	Bracon_brevicornis	0	0	0	15	1
strain_2	2019-03-15	20	15	15	10	5	Bracon_brevicornis	0	0	0	15	1
strain_2	2019-03-15	20	15	10	5	5	Bracon_brevicornis	0	0	0	15	1
strain_2	2019-03-15	20	15	25	4	21	Bracon_brevicornis	0	0	0	15	1
strain_2	2019-03-19	20	15	5	2	3	Bracon_brevicornis	0	0	0	15	1
strain_2	2019-03-15	20	15	2	2	0	Bracon_brevicornis	0	0	0	15	1
strain_2	2019-03-19	20	15	2	1	1	Bracon_brevicornis	0	0	0	15	1
strain_2	2019-04-08	20	15	44	29	15	Bracon_brevicornis	0	0	0	15	1
strain_2	2019-04-16	20	15	12	11	1	Bracon_brevicornis	0	0	0	15	1
strain_3	2019-02-04	20	15	15	7	8	Bracon_brevicornis	0	1	1	15	1
strain_3	2019-03-21	20	15	5	0	5	Bracon_brevicornis	0	0	0	15	1
strain_3	2019-03-21	20	15	10	8	2	Bracon_brevicornis	0	0	0	15	1
strain_3	2019-03-23	20	15	11	0	11	Bracon_brevicornis	0	1	0	14	0.933333
strain_3	2019-04-29	20	15	14	6	8	Bracon_brevicornis	1	0	0	14	0.933333
strain_3	2019-04-29	20	15	9	4	5	Bracon_brevicornis	0	0	0	15	1
strain_3	2019-04-29	20	15	17	8	9	Bracon_brevicornis	0	0	0	15	1
strain_4	2019-02-04	20	15	18	13	5	Bracon_hebetor	0	1	0	14	0.933333
strain_4	2019-03-28	20	15	11	8	3	Bracon_hebetor	0	0	0	15	1
strain_4	2019-04-29	20	15	3	0	3	Bracon_hebetor	1	0	0	14	0.933333
strain_5	2019-02-04	20	15	22	7	15	Bracon_hebetor	0	3	0	12	0.8
strain_5	2019-03-19	20	15	4	3	1	Bracon_hebetor	0	0	0	15	1
strain_5	2019-03-19	20	15	10	8	2	Bracon_hebetor	0	0	0	15	1
strain_5	2019-03-19	20	15	20	0	20	Bracon_hebetor	0	0	0	15	1
strain_5	2019-04-16	20	15	15	6	9	Bracon_hebetor	0	0	0	3	0.2
strain_5	2019-04-16	20	15	24	0	24	Bracon_hebetor	1	0	1	13	0.866667
strain_5	2019-04-16	20	15	28	14	14	Bracon_hebetor	0	0	0	15	1
control	2019-03-01	27	15	0	0	0	control	0	6	2	13	0.866667
control	2019-04-04	27	15	0	0	0	control	0	12	1	14	0.933333
strain_1	2019-01-11	27	15	24	17	7	Bracon_hebetor	0	0	6	9	0.6
strain_1	2019-01-11	27	15	57	3	54	Bracon_hebetor	0	0	1	14	0.933333
strain_1	2019-01-21	27	15	9	0	9	Bracon_hebetor	0	0	0	15	1
strain_1	2019-01-21	27	15	62	0	62	Bracon_hebetor	0	0	1	14	0.933333
strain_1	2019-01-31	27	15	NA	NA	NA	Bracon_hebetor	0	0	7	8	0.533333
strain_1	2019-02-04	27	15	34	2	32	Bracon_hebetor	0	1	0	15	1
strain_1		27	15	63	23	40	Bracon_hebetor	0	0	0	15	1
strain_1		27	15	31	22	9	Bracon_hebetor	0	4	0	15	1
strain_2	2019-01-11	27	15	19	1	18	Bracon_brevicornis	0	0	0	15	1
strain_2	2019-01-11	27	15	30	22	8	Bracon_brevicornis	0	0	0	15	1
strain_2	2019-01-21	27	15	24	0	24	Bracon_brevicornis	0	0	0	15	1
strain_2	2019-01-21	27	15	25	25	0	Bracon_brevicornis	0	0	0	15	1
strain_2	2019-02-04	27	15	66	38	28	Bracon_brevicornis	0	0	0	15	1
strain_2	2019-04-08	27	15	44	12	32	Bracon_brevicornis	0	0	0	15	1
strain_2	2019-04-08	27	15	14	12	2	Bracon_brevicornis	0	0	0	15	1
strain_2	2019-04-08	27	15	42	0	42	Bracon_brevicornis	0	0	0	15	1
strain_3	2019-01-11	27	15	52	20	32	Bracon_brevicornis	0	0	0	15	1
strain_3	2019-01-11	27	15	37	14	23	Bracon_brevicornis	0	0	0	15	1
strain_3	2019-01-21	27	15	NA	NA	NA	Bracon_brevicornis	NA	NA	0	NA	NA
strain_3	2019-01-21	27	15	66	43	23	Bracon_brevicornis	0	0	0	15	1
strain_3	2019-01-31	27	15	65	42	23	Bracon_brevicornis	0	0	0	15	1
strain_3	2019-01-21	27	15	51	37	14	Bracon_brevicornis	0	0	0	15	1
strain_3	2019-04-26	27	15	61	40	21	Bracon_brevicornis	0	0	0	15	1
strain_3	2019-04-26	27	15	61	32	29	Bracon_brevicornis	0	0	0	15	1
strain_3	2019-04-26	27	15	12	1	11	Bracon_brevicornis	0	0	0	15	1
strain_3	2019-04-26	27	15	57	13	44	Bracon_brevicornis	0	0	0	15	1
strain_4	2019-01-11	27	15	34	11	23	Bracon_hebetor	0	0	8	7	0.466667
strain_4	2019-01-11	27	15	31	14	17	Bracon_hebetor	0	0	3	12	0.8
strain_4	2019-02-07	27	15	56	24	32	Bracon_hebetor	0	0	4	11	0.733333
strain_4	2019-02-07	27	15	39	27	12	Bracon_hebetor	0	2	0	15	1
strain_4	2019-02-04	27	15	22	11	11	Bracon_hebetor	0	0	1	14	0.933333
strain_4	2019-02-04	27	15	80	63	17	Bracon_hebetor	0	0	0	15	1
strain_4	2019-02-07	27	15	97	68	29	Bracon_hebetor	0	0	2	13	0.866667
strain_4	2019-02-07	27	15	31	8	23	Bracon_hebetor	0	0	0	15	1
strain_5	2019-02-07	27	15	26	17	9	Bracon_hebetor	0	0	4	11	0.733333
strain_5	2019-02-07	27	15	48	24	24	Bracon_hebetor	0	0	1	14	0.933333
strain_5	2019-02-07	27	15	37	27	10	Bracon_hebetor	0	1	0	15	1
strain_5	2019-05-31	27	15	9	6	3	Bracon_hebetor	0	0	0	15	1
strain_2	2019-05-31	36	15	6	2	4	Bracon_brevicornis	0	0	0	15	1
strain_1	2019-05-31	36	15	2	2	0	Bracon_hebetor	0	0	0	15	1
strain_1	2019-05-31	36	15	2	0	2	Bracon_hebetor	0	0	0	15	1
strain_2	2019-06-11	36	15	9	1	8	Bracon_brevicornis	0	0	0	15	1
strain_5	2019-06-11	36	15	8	4	4	Bracon_hebetor	0	0	0	15	1
strain_4	2019-05-31	36	15	0	0	0	Bracon_hebetor	0	0	0	15	1
strain_4	2019-05-31	36	15	0	0	0	Bracon_hebetor	0	0	0	15	1
strain_4	2019-05-31	36	15	0	0	0	Bracon_hebetor	0	0	0	15	1
strain_4	2019-05-31	36	15	0	0	0	Bracon_hebetor	0	0	0	15	1
strain_4	2019-05-31	36	15	0	0	0	Bracon_hebetor	0	0	0	15	1
strain_1	2019-06-11	36	15	0	0	0	Bracon_hebetor	0	0	0	15	1
strain_1	2019-06-11	36	15	0	0	0	Bracon_hebetor	0	0	0	15	1
strain_2	2019-06-11	36	15	0	0	0	Bracon_brevicornis	0	0	2	13	0.866667
strain_2	2019-06-11	36	15	0	0	0	Bracon_brevicornis	0	0	0	15	1
strain_2	2019-06-11	36	15	0	0	0	Bracon_brevicornis	0	0	0	15	1
strain_2	2019-06-11	36	15	0	0	0	Bracon_brevicornis	0	0	0	15	1
strain_3	2019-06-11	36	15	0	0	0	Bracon_brevicornis	0	0	1	14	0.933333
strain_3	2019-06-11	36	15	0	0	0	Bracon_brevicornis	0	0	0	15	1
strain_3	2019-06-11	36	15	0	0	0	Bracon_brevicornis	0	0	0	15	1
strain_4	2019-06-11	36	15	0	0	0	Bracon_hebetor	0	0	0	15	1
strain_4	2019-06-11	36	15	0	0	0	Bracon_hebetor	0	0	1	14	0.933333
strain_4	2019-06-11	36	15	0	0	0	Bracon_hebetor	0	0	0	15	1
strain_4	2019-06-11	36	15	0	0	0	Bracon_hebetor	0	0	0	15	1
strain_5	2019-06-11	36	15	0	0	0	Bracon_hebetor	0	0	0	15	1
strain_2	2019-06-11	36	15	0	0	1	Bracon_brevicornis	0	0	0	15	1
control	2019-03-15	12	20	0	0	0	control	0	0	0	0	0
control	2019-03-19	12	20	0	0	0	control	0	0	0	0	0
control	2019-04-26	12	20	0	0	0	control	0	0	0	0	0
strain_1	2019-03-19	12	20	0	0	0	Bracon_hebetor	0	0	NA	NA	NA
strain_1	2019-03-19	12	20	0	0	0	Bracon_hebetor	4	0	0	16	0.8
strain_1	2019-03-19	12	20	0	0	0	Bracon_hebetor	1	0	0	19	0.95
strain_1	2019-03-19	12	20	0	0	0	Bracon_hebetor	0	0	0	20	1
strain_1	2019-03-19	12	20	0	0	0	Bracon_hebetor	1	0	0	19	0.95
strain_2	2019-04-02	12	20	0	0	0	Bracon_brevicornis	1	0	0	19	0.95
strain_2	2019-04-02	12	20	0	0	0	Bracon_brevicornis	1	0	0	19	0.95
strain_2	2019-04-02	12	20	0	0	0	Bracon_brevicornis	1	0	0	19	0.95
strain_2	2019-04-02	12	20	0	0	0	Bracon_brevicornis	14	0	0	6	0.3
strain_2	2019-04-02	12	20	0	0	0	Bracon_brevicornis	3	0	0	17	0.85
strain_2	2019-04-02	12	20	0	0	0	Bracon_brevicornis	10	0	0	10	0.5
strain_2	2019-04-02	12	20	0	0	0	Bracon_brevicornis	3	0	0	17	0.85
strain_2	2019-04-02	12	20	0	0	0	Bracon_brevicornis	3	0	0	17	0.85
strain_2	2019-04-02	12	20	0	0	0	Bracon_brevicornis	1	0	0	19	0.95
strain_3	2019-04-26	12	20	0	0	0	Bracon_brevicornis	2	0	0	18	0.9
strain_3	2019-04-26	12	20	0	0	0	Bracon_brevicornis	0	0	0	20	1
strain_3	2019-04-26	12	20	0	0	0	Bracon_brevicornis	0	0	0	20	1
strain_4	2019-04-26	12	20	0	0	0	Bracon_hebetor	0	0	NA	NA	NA
strain_4	2019-04-26	12	20	0	0	0	Bracon_hebetor	1	0	0	19	0.95
strain_4	2019-04-26	12	20	0	0	0	Bracon_hebetor	0	0	0	20	1
strain_5	2019-03-15	12	20	0	0	0	Bracon_hebetor	4	0	0	16	0.8
strain_5	2019-03-15	12	20	0	0	0	Bracon_hebetor	4	0	0	16	0.8
strain_5	2019-03-15	12	20	0	0	0	Bracon_hebetor	0	0	0	20	1
strain_5	2019-03-15	12	20	0	0	0	Bracon_hebetor	0	0	0	20	1
strain_5	2019-03-15	12	20	0	0	0	Bracon_hebetor	0	0	0	20	1
control	2019-04-04	20	20	0	0	0	control	7	13	0	0	0
strain_1	2019-02-04	20	20	21	9	12	Bracon_hebetor	0	2	0	18	0.9
strain_1	2019-03-04	20	20	8	3	5	Bracon_hebetor	0	0	0	20	1
strain_1	2019-03-04	20	20	3	2	1	Bracon_hebetor	0	0	0	20	1
strain_1	2019-03-04	20	20	10	7	3	Bracon_hebetor	0	0	0	20	1
strain_1	2019-04-08	20	20	16	0	16	Bracon_hebetor	0	0	0	20	1
strain_1	2019-04-08	20	20	13	6	7	Bracon_hebetor	0	1	0	19	0.95
strain_1	2019-04-08	20	20	16	0	16	Bracon_hebetor	0	0	0	20	1
strain_1	2019-04-08	20	20	2	0	2	Bracon_hebetor	0	1	0	19	0.95
strain_2	2019-02-04	20	20	28	16	12	Bracon_brevicornis	0	0	0	20	1
strain_2	2019-03-21	20	20	16	0	16	Bracon_brevicornis	0	0	0	20	1
strain_2	2019-04-08	20	20	7	7	0	Bracon_brevicornis	0	0	0	20	1
strain_2	2019-04-08	20	20	6	5	1	Bracon_brevicornis	0	0	1	19	0.95
strain_2	2019-04-08	20	20	34	14	20	Bracon_brevicornis	0	0	0	20	1
strain_2	2019-04-02	20	20	11	0	11	Bracon_brevicornis	0	0	1	19	0.95
strain_2	2019-04-02	20	20	25	15	10	Bracon_brevicornis	0	0	4	5	0.25
strain_2	2019-04-02	20	20	24	0	24	Bracon_brevicornis	0	0	0	9	0.45
strain_2	2019-04-02	20	20	27	5	22	Bracon_brevicornis	0	0	1	8	0.4
strain_2	2019-04-16	20	20	18	13	5	Bracon_brevicornis	0	0	0	12	0.6
strain_3	2019-03-23	20	20	11	5	6	Bracon_brevicornis	0	0	0	20	1
strain_3	2019-03-23	20	20	18	0	18	Bracon_brevicornis	0	0	0	20	1
strain_3	2019-03-23	20	20	2	0	2	Bracon_brevicornis	0	0	NA	NA	NA
strain_3	2019-04-29	20	20	23	3	20	Bracon_brevicornis	0	0	0	20	1
strain_3	2019-04-29	20	20	14	8	6	Bracon_brevicornis	5	4	0	11	0.55
strain_3	2019-04-29	20	20	10	3	7	Bracon_brevicornis	1	0	0	19	0.95
strain_3	2019-04-29	20	20	11	4	7	Bracon_brevicornis	0	0	0	20	1
strain_4	2019-02-04	20	20	22	0	22	Bracon_hebetor	0	1	0	19	0.95
strain_4	2019-04-29	20	20	14	10	4	Bracon_hebetor	0	0	0	20	1
strain_5	2019-02-04	20	20	32	19	13	Bracon_hebetor	0	1	0	19	0.95
strain_5	2019-03-19	20	20	24	7	17	Bracon_hebetor	0	0	0	20	1
strain_5	2019-03-19	20	20	20	12	8	Bracon_hebetor	0	0	0	20	1
control	2019-03-01	27	20	0	0	0	control	0	9	9	11	0.55
control	2019-04-04	27	20	0	0	0	control	0	9	4	16	0.8
strain_1	2019-01-31	27	20	50	24	26	Bracon_hebetor	0	0	0	20	1
strain_1	2019-01-31	27	20	76	0	76	Bracon_hebetor	0	0	0	20	1
strain_1	2019-02-04	27	20	65	53	12	Bracon_hebetor	0	0	0	20	1
strain_1		27	20	26	16	10	Bracon_hebetor	0	1	0	20	1
strain_1	2019-02-18	27	20	61	21	40	Bracon_hebetor	0	0	0	20	1
strain_1	2019-02-18	27	20	60	2	58	Bracon_hebetor	0	0	0	20	1
strain_2	2019-02-04	27	20	12	0	12	Bracon_brevicornis	0	0	0	20	1
strain_2	2019-01-21	27	20	87	0	87	Bracon_brevicornis	0	0	0	20	1
strain_2	2019-04-08	27	20	40	29	11	Bracon_brevicornis	0	0	0	20	1
strain_2	2019-04-08	27	20	27	15	12	Bracon_brevicornis	0	0	0	20	1
strain_2	2019-04-08	27	20	29	7	22	Bracon_brevicornis	0	0	0	20	1
strain_2	2019-04-08	27	20	18	0	18	Bracon_brevicornis	0	0	0	20	1
strain_2	2019-04-08	27	20	36	26	10	Bracon_brevicornis	0	0	0	20	1
strain_2	2019-04-08	27	20	30	0	30	Bracon_brevicornis	0	0	0	20	1
strain_3	2019-01-31	27	20	7	3	4	Bracon_brevicornis	0	0	0	20	1
strain_3	2019-02-18	27	20	60	0	60	Bracon_brevicornis	0	0	0	20	1
strain_3	2019-02-18	27	20	62	45	17	Bracon_brevicornis	0	0	0	20	1
strain_3	2019-04-26	27	20	54	39	15	Bracon_brevicornis	0	0	0	20	1
strain_3	2019-04-26	27	20	27	18	9	Bracon_brevicornis	0	0	0	20	1
strain_3	2019-04-26	27	20	34	15	19	Bracon_brevicornis	0	0	0	20	1
strain_3	2019-04-26	27	20	53	28	25	Bracon_brevicornis	0	0	1	19	0.95
strain_3	2019-04-26	27	20	30	13	17	Bracon_brevicornis	0	0	0	20	1
strain_3	2019-04-26	27	20	27	7	20	Bracon_brevicornis	0	0	2	18	0.9
strain_3	2019-04-26	27	20	70	0	70	Bracon_brevicornis	0	0	2	18	0.9
strain_4	2019-02-07	27	20	58	0	58	Bracon_hebetor	0	0	0	20	1
strain_4	2019-02-07	27	20	24	8	16	Bracon_hebetor	0	0	0	20	1
strain_4	2019-02-07	27	20	22	14	8	Bracon_hebetor	0	2	4	16	0.8
strain_4	2019-02-04	27	20	58	0	58	Bracon_hebetor	0	0	0	20	1
strain_4	2019-02-07	27	20	84	0	84	Bracon_hebetor	0	1	1	19	0.95
strain_4	2019-02-18	27	20	49	17	32	Bracon_hebetor	0	0	3	17	0.85
strain_4	2019-02-18	27	20	47	19	28	Bracon_hebetor	0	0	2	18	0.9
strain_4	2019-04-26	27	20	41	2	39	Bracon_hebetor	0	0	3	17	0.85
strain_5	2019-02-04	27	20	65	22	43	Bracon_hebetor	0	0	2	18	0.9
strain_5	2019-02-07	27	20	60	0	60	Bracon_hebetor	0	2	0	20	1
strain_5	2019-01-21	27	20	34	20	14	Bracon_hebetor	0	0	0	20	1
strain_5	2019-02-07	27	20	37	26	11	Bracon_hebetor	0	2	0	20	1
strain_5	2019-02-18	27	20	29	14	15	Bracon_hebetor	0	0	4	16	0.8
strain_5	2019-02-18	27	20	74	54	20	Bracon_hebetor	0	1	0	20	1
strain_5	2019-02-18	27	20	32	15	17	Bracon_hebetor	0	3	2	18	0.9
strain_4	2019-06-11	36	20	1	0	1	Bracon_hebetor	0	0	0	20	1
strain_1	2019-05-31	36	20	0	0	0	Bracon_hebetor	0	0	0	20	1
strain_5	2019-06-11	36	20	0	0	0	Bracon_hebetor	0	0	1	19	0.95
strain_4	2019-05-31	36	20	0	0	0	Bracon_hebetor	0	0	0	20	1
strain_4	2019-05-31	36	20	0	0	0	Bracon_hebetor	0	0	0	20	1
strain_4	2019-05-31	36	20	0	0	0	Bracon_hebetor	0	0	0	20	1
strain_1	2019-06-11	36	20	0	0	0	Bracon_hebetor	0	0	0	20	1
strain_1	2019-06-11	36	20	0	0	0	Bracon_hebetor	0	0	0	20	1
strain_1	2019-06-11	36	20	0	0	0	Bracon_hebetor	0	0	0	20	1
strain_2	2019-06-11	36	20	0	0	0	Bracon_brevicornis	0	0	0	20	1
strain_2	2019-06-11	36	20	0	0	0	Bracon_brevicornis	0	0	0	20	1
strain_2	2019-06-11	36	20	0	0	0	Bracon_brevicornis	0	0	0	20	1
strain_2	2019-06-11	36	20	0	0	0	Bracon_brevicornis	0	0	0	20	1
strain_3	2019-06-11	36	20	0	0	0	Bracon_brevicornis	0	0	0	20	1
strain_3	2019-06-11	36	20	0	0	0	Bracon_brevicornis	0	0	2	18	0.9
strain_3	2019-06-11	36	20	0	0	0	Bracon_brevicornis	0	0	0	20	1
strain_4	2019-06-11	36	20	0	0	0	Bracon_hebetor	0	0	0	20	1
strain_4	2019-06-11	36	20	0	0	0	Bracon_hebetor	0	0	0	20	1
strain_4	2019-06-11	36	20	0	0	0	Bracon_hebetor	0	0	0	20	1
strain_4	2019-06-11	36	20	0	0	0	Bracon_hebetor	0	0	1	19	0.95
strain_5	2019-06-11	36	20	0	0	0	Bracon_hebetor	0	0	0	20	1
strain_5	2019-06-11	36	20	0	0	0	Bracon_hebetor	0	0	1	20	1
strain_5	2019-06-11	36	20	0	0	0	Bracon_hebetor	0	0	2	20	1
control	2019-03-15	12	25	0	0	0	control	0	0	0	0	0
control	2019-03-19	12	25	0	0	0	control	5	0	0	0	0
control	2019-04-26	12	25	0	0	0	control	0	0	0	0	0
strain_1	2019-03-19	12	25	0	0	0	Bracon_hebetor	0	0	NA	NA	NA
strain_1	2019-03-19	12	25	0	0	0	Bracon_hebetor	0	0	0	25	1
strain_1	2019-03-19	12	25	0	0	0	Bracon_hebetor	1	0	NA	NA	NA
strain_1	2019-03-19	12	25	0	0	0	Bracon_hebetor	1	0	0	24	0.96
strain_1	2019-03-19	12	25	0	0	0	Bracon_hebetor	1	0	0	24	0.96
strain_2	2019-03-15	12	25	0	0	0	Bracon_brevicornis	5	0	0	20	0.8
strain_2	2019-03-15	12	25	0	0	0	Bracon_brevicornis	2	0	0	23	0.92
strain_2	2019-03-15	12	25	0	0	0	Bracon_brevicornis	0	0	0	25	1
strain_2	2019-03-15	12	25	0	0	0	Bracon_brevicornis	0	0	0	25	1
strain_2	2019-03-15	12	25	0	0	0	Bracon_brevicornis	2	0	0	23	0.92
strain_2	2019-04-02	12	25	0	0	0	Bracon_brevicornis	5	0	0	20	0.8
strain_2	2019-04-02	12	25	0	0	0	Bracon_brevicornis	1	0	0	24	0.96
strain_2	2019-04-02	12	25	0	0	0	Bracon_brevicornis	5	0	0	20	0.8
strain_2	2019-04-02	12	25	0	0	0	Bracon_brevicornis	0	0	0	25	1
strain_3	2019-04-26	12	25	0	0	0	Bracon_brevicornis	0	0	0	25	1
strain_3	2019-04-26	12	25	0	0	0	Bracon_brevicornis	0	0	0	25	1
strain_3	2019-04-26	12	25	0	0	0	Bracon_brevicornis	0	0	0	25	1
strain_3	2019-04-26	12	25	0	0	0	Bracon_brevicornis	2	0	0	23	0.92
strain_4	2019-04-26	12	25	0	0	0	Bracon_hebetor	0	0	0	25	1
strain_4	2019-04-26	12	25	0	0	0	Bracon_hebetor	0	0	NA	NA	NA
strain_4	2019-04-26	12	25	0	0	0	Bracon_hebetor	0	0	0	25	1
strain_4	2019-04-26	12	25	0	0	0	Bracon_hebetor	0	0	0	25	1
strain_4	2019-04-26	12	25	0	0	0	Bracon_hebetor	2	0	0	23	0.92
strain_4	2019-04-26	12	25	0	0	0	Bracon_hebetor	0	0	0	25	1
strain_4	2019-04-26	12	25	0	0	0	Bracon_hebetor	0	0	0	25	1
strain_5	2019-03-23	12	25	0	0	0	Bracon_hebetor	0	0	0	25	1
strain_5	2019-03-23	12	25	0	0	0	Bracon_hebetor	2	0	0	23	0.92
strain_5	2019-03-23	12	25	0	0	0	Bracon_hebetor	0	0	0	25	1
strain_5	2019-03-23	12	25	0	0	0	Bracon_hebetor	0	0	0	25	1
strain_5	2019-03-23	12	25	0	0	0	Bracon_hebetor	0	0	0	25	1
control	2019-03-01	20	25	0	0	0	control	0	5	0	20	0.8
control	2019-04-04	20	25	0	0	0	control	13	12	0	0	0
strain_1	2019-03-04	20	25	18	13	5	Bracon_hebetor	0	0	0	25	1
strain_1	2019-03-04	20	25	23	3	20	Bracon_hebetor	0	0	0	25	1
strain_1	2019-03-04	20	25	22	16	6	Bracon_hebetor	0	0	0	25	1
strain_1	2019-03-04	20	25	7	7	0	Bracon_hebetor	0	0	0	25	1
strain_2	2019-04-02	20	25	16	2	14	Bracon_brevicornis	0	0	0	25	1
strain_2	2019-04-02	20	25	15	0	15	Bracon_brevicornis	0	0	NA	NA	NA
strain_2	2019-04-02	20	25	15	0	15	Bracon_brevicornis	0	0	NA	NA	NA
strain_2	2019-04-02	20	25	15	0	15	Bracon_brevicornis	0	0	3	7	0.28
strain_2	2019-04-02	20	25	3	0	3	Bracon_brevicornis	0	0	3	17	0.68
strain_2	2019-04-02	20	25	21	6	15	Bracon_brevicornis	0	0	8	15	0.6
strain_2	2019-04-02	20	25	14	3	11	Bracon_brevicornis	0	0	6	19	0.76
strain_2	2019-04-02	20	25	9	0	9	Bracon_brevicornis	0	0	10	15	0.6
strain_3	2019-03-04	20	25	9	9	0	Bracon_brevicornis	0	0	0	25	1
strain_3	2019-03-04	20	25	8	4	4	Bracon_brevicornis	0	0	0	25	1
strain_3	2019-03-04	20	25	5	5	0	Bracon_brevicornis	0	1	0	24	0.96
strain_3	2019-03-04	20	25	32	9	23	Bracon_brevicornis	0	0	0	25	1
strain_3	2019-03-21	20	25	48	2	46	Bracon_brevicornis	0	0	0	25	1
strain_3	2019-04-29	20	25	13	11	2	Bracon_brevicornis	0	0	0	25	1
strain_3	2019-04-29	20	25	12	0	12	Bracon_brevicornis	1	1	0	23	0.92
strain_3	2019-04-29	20	25	6	4	2	Bracon_brevicornis	0	0	0	25	1
strain_4	2019-04-29	20	25	5	1	4	Bracon_hebetor	0	0	0	25	1
strain_5	2019-03-21	20	25	41	28	13	Bracon_hebetor	0	0	0	25	1
strain_5	2019-03-21	20	25	32	11	21	Bracon_hebetor	0	0	0	25	1
strain_5	2019-03-21	20	25	31	20	11	Bracon_hebetor	0	0	0	25	1
strain_5	2019-03-19	20	25	8	3	5	Bracon_hebetor	0	0	2	3	0.12
strain_5	2019-03-19	20	25	8	4	4	Bracon_hebetor	0	1	0	5	0.2
control	2019-03-01	27	25	0	0	0	control	0	14	0	25	1
control	2019-04-04	27	25	0	0	0	control	0	12	0	25	1
strain_1	2019-02-18	27	25	38	23	15	Bracon_hebetor	0	0	0	25	1
strain_1	2019-02-18	27	25	59	26	33	Bracon_hebetor	0	0	0	25	1
strain_1	2019-03-01	27	25	49	17	32	Bracon_hebetor	0	0	0	25	1
strain_1	2019-03-01	27	25	73	28	45	Bracon_hebetor	0	0	0	25	1
strain_1	2019-03-01	27	25	23	9	14	Bracon_hebetor	0	0	0	25	1
strain_1	2019-03-01	27	25	48	21	27	Bracon_hebetor	0	0	0	25	1
strain_2	2019-04-15	27	25	41	30	11	Bracon_brevicornis	0	0	0	25	1
strain_2	2019-04-15	27	25	89	8	81	Bracon_brevicornis	0	0	0	25	1
strain_2	2019-04-15	27	25	77	19	58	Bracon_brevicornis	0	0	0	25	1
strain_2	2019-04-15	27	25	80	0	80	Bracon_brevicornis	0	0	0	25	1
strain_2	2019-04-15	27	25	61	0	61	Bracon_brevicornis	0	0	0	25	1
strain_2	2019-04-15	27	25	51	16	35	Bracon_brevicornis	0	0	0	25	1
strain_2	2019-04-15	27	25	64	0	64	Bracon_brevicornis	0	0	0	25	1
strain_2	2019-04-15	27	25	82	52	30	Bracon_brevicornis	0	0	0	25	1
strain_2	2019-04-15	27	25	78	0	78	Bracon_brevicornis	0	0	0	25	1
strain_2	2019-04-15	27	25	72	0	72	Bracon_brevicornis	0	0	0	25	1
strain_3	2019-02-18	27	25	53	37	16	Bracon_brevicornis	0	0	0	25	1
strain_3	2019-02-18	27	25	60	47	13	Bracon_brevicornis	0	3	0	25	1
strain_3	2019-02-18	27	25	40	14	26	Bracon_brevicornis	0	0	0	25	1
strain_3	2019-04-26	27	25	34	11	23	Bracon_brevicornis	0	0	2	23	0.92
strain_3	2019-04-26	27	25	12	3	9	Bracon_brevicornis	0	0	0	25	1
strain_3	2019-04-26	27	25	44	20	24	Bracon_brevicornis	0	0	3	22	0.88
strain_3	2019-04-26	27	25	48	24	24	Bracon_brevicornis	0	0	2	23	0.92
strain_3	2019-04-26	27	25	56	22	34	Bracon_brevicornis	0	0	6	19	0.76
strain_3	2019-04-26	27	25	77	45	32	Bracon_brevicornis	0	0	0	25	1
strain_3	2019-04-26	27	25	72	58	14	Bracon_brevicornis	0	0	10	15	0.6
strain_4	2019-02-18	27	25	47	20	27	Bracon_hebetor	0	0	3	22	0.88
strain_4	2019-02-18	27	25	46	14	32	Bracon_hebetor	0	0	4	21	0.84
strain_4	2019-03-01	27	25	67	0	67	Bracon_hebetor	0	0	3	22	0.88
strain_4	2019-03-01	27	25	31	21	10	Bracon_hebetor	0	0	6	19	0.76
strain_4	2019-03-01	27	25	41	21	20	Bracon_hebetor	0	0	6	19	0.76
strain_5	2019-02-18	27	25	8	2	6	Bracon_hebetor	0	0	4	21	0.84
strain_5	2019-03-26	27	25	46	21	25	Bracon_hebetor	0	0	2	23	0.92
strain_2	2019-06-11	36	25	12	0	12	Bracon_brevicornis	0	0	0	25	1
strain_2	2019-06-11	36	25	11	2	9	Bracon_brevicornis	0	0	0	25	1
strain_2	2019-06-11	36	25	13	0	13	Bracon_brevicornis	0	0	0	25	1
strain_1	2019-05-31	36	25	0	0	0	Bracon_hebetor	0	0	0	25	1
strain_4	2019-05-31	36	25	0	0	0	Bracon_hebetor	0	0	0	25	1
strain_4	2019-05-31	36	25	0	0	0	Bracon_hebetor	0	0	0	25	1
strain_4	2019-05-31	36	25	0	0	0	Bracon_hebetor	0	0	0	25	1
strain_1	2019-06-11	36	25	0	0	0	Bracon_hebetor	0	0	0	25	1
strain_1	2019-06-11	36	25	0	0	0	Bracon_hebetor	0	0	0	25	1
strain_1	2019-06-11	36	25	0	0	0	Bracon_hebetor	0	0	0	25	1
strain_1	2019-06-11	36	25	0	0	0	Bracon_hebetor	0	0	1	24	0.96
strain_2	2019-06-11	36	25	0	0	0	Bracon_brevicornis	0	0	0	25	1
strain_3	2019-06-11	36	25	0	0	0	Bracon_brevicornis	0	0	0	25	1
strain_3	2019-06-11	36	25	0	0	0	Bracon_brevicornis	0	0	1	24	0.96
strain_3	2019-06-11	36	25	0	0	0	Bracon_brevicornis	0	0	1	24	0.96
strain_3	2019-06-11	36	25	0	0	0	Bracon_brevicornis	0	0	0	25	1
strain_4	2019-06-11	36	25	0	0	0	Bracon_hebetor	0	0	0	25	1
strain_4	2019-06-11	36	25	0	0	0	Bracon_hebetor	0	0	0	25	1
strain_4	2019-06-11	36	25	0	0	0	Bracon_hebetor	0	0	1	24	0.96
strain_4	2019-06-11	36	25	0	0	0	Bracon_hebetor	0	0	1	24	0.96
strain_5	2019-06-11	36	25	0	0	0	Bracon_hebetor	0	0	0	25	1
strain_5	2019-06-11	36	25	0	0	0	Bracon_hebetor	0	0	0	25	1
strain_5	2019-06-11	36	25	0	0	0	Bracon_hebetor	0	0	1	25	1
strain_5	2019-06-11	36	25	0	0	0	Bracon_hebetor	0	0	0	25	1
