# Supplementary material for: Bracon wasps for ecological pest control–a laboratory experiment
Source: PeerJ. 2021 May 27;9:e11540. doi: 10.7717/peerj.11540 (PMC8164837; doi:10.7717/peerj.11540)
Supplement: Supplemental Information 5 — Mean numbers of total offspring, males and females from parasitization on different numbers of host larvae (5, 10, 15, 20, 25) at different temperatures (12 °C, 20 °C, 27 °C, 36 °C) in Bracon brevicornis and Bracon hebetor. Standard deviations are given in brackets. [file peerj-09-11540-s005.xlsx]

## Sheet: Tabelle1
Appedix 5 Mean numbers of total offspring, males and females from parasitization on different numbers of host larvae (5, 10, 15, 20, 25) at different temperatures (12°C, 20°C, 27°C, 36°C) in Bracon brevicornis and Bracon hebetor. Standard deviations are given in brackets.
20°C
	Bracon brevicornis			Bracon hebetor
no. of host larvae	total	male	female	total	male	female
5	14.4±7.5	10.6±8.0	3.7±4.2	14.6±10.2	8.9±9.4	5.9±5.6
10	16.6±10.7	12.1±8.8	4.4±5.5	16.3±11.0	10.0±6.6	6.3±7.3
15	12.6±10.3	6.6±5.5	6.1±7.1	15.0±7.4	7.3±7.5	7.7±6.4
20	16.8±8.9	11.0±7.7	5.8±5.6	15.5±8.5	9.7±6.7	5.8±5.8
25	15.1±11.2	11.6±11.4	3.4±2.7	19.5±12.5	8.9±7.1	10.6±8.8
27°C
	Bracon brevicornis			Bracon hebetor
no. of host larvae	total	male	female	total	male	female
5	27.9±10.7	17.1±12.6	10.8±8.5	31.2±9.6	20.5±8.3	10.6±9.3
10	41.2±17.5	18.0±11.5	23.2±17.9	48.7±19.0	34.1±20.2	14.6±16.9
15	42.7±19.0	22.0±12.4	20.7±15.7	41.6±22.9	22.3±16.2	19.3±18.6
20	39.1±21.1	25.4±22.9	13.6±14.5	50.1±18.2	34.5±23.2	15.6±15.5
25	59.6±19.5	39.3±25.2	20.3±18.9	44.3±17.3	27.2±16.21	17.2±8.6
36°C
	Bracon brevicornis			Bracon hebetor
no. of host larvae	total	male	female	total	male	female
5	1.2±2.8	0.8±2.4	0.4±1.1	0.2±0.8	0.1±0.5	0.1±0.3
10	0.2±0.7	0.2±0.7	0	0.4±0.8	0.2±0.4	0.3±0.6
15	1.6±3.2	1.3±2.7	0.3±0.7	0.8±2.1	0.4±1.1	0.4±1.1
20	0	0	0	0.1±0.3	0.1±0.3	0
25	4.5±6.2	4.3±6.0	0.3±0.7	0	0	0
